1 **Homeostatic feedback, not early activity, modulates development of two-state**  
2 **patterned activity in the *C. elegans* egg-laying circuit**

3 Bhavya Ravi<sup>1,2</sup>, Jessica Garcia<sup>2</sup>, and Kevin M. Collins<sup>1,2,3</sup>

4 <sup>1</sup>Neuroscience Program, University of Miami Miller School of Medicine, Miami, FL USA

5 <sup>2</sup>Department of Biology, University of Miami, Coral Gables, FL USA

6 <sup>3</sup>To whom correspondence should be addressed:

7 [kevin.collins@miami.edu](mailto:kevin.collins@miami.edu)

8 Department of Biology

9 University of Miami

10 1301 Memorial Drive

11 Coral Gables, FL 33143

12 Tel: (305) 284-9058

13 Website: [www.bio.miami.edu/CollinsLab/](http://www.bio.miami.edu/CollinsLab/)

14 Twitter: @kevinemco

15 Short title: Development of *C. elegans* egg-laying circuit activity and behavior

16 63 pages with 9 Figures, 3 Supplemental Figures, 1 Supplemental Methods, 1

17 Supplementary Table, and 6 Supplementary Movies

18 **Disclosures**

19 The authors declare that no competing interests exist. BR, JG, and KMC performed  
20 experiments and data analysis, and BR and KMC wrote the paper.

21 **Abstract**

22 Neuron activity accompanies synapse formation and maintenance, but how early circuit  
23 activity contributes to behavior development is not well understood. Here, we use the  
24 *Caenorhabditis elegans* egg-laying motor circuit as a model to understand how  
25 coordinated cell and circuit activity develops and drives a robust two-state behavior in  
26 adults. Using calcium imaging in behaving animals, we find the Hermaphrodite Specific  
27 Neurons (HSNs) and vulval muscles show rhythmic Ca<sup>2+</sup> transients in L4 larvae before  
28 eggs are produced. HSN activity in L4 is tonic and lacks the alternating burst-  
29 firing/quiescent pattern seen in egg-laying adults. Vulval muscle activity in L4 is initially  
30 uncoordinated, but becomes synchronous as the anterior and posterior muscle arms  
31 meet at HSN synaptic release sites. However, coordinated muscle activity does not  
32 require presynaptic HSN input. Using reversible silencing experiments, we show that  
33 neuronal and vulval muscle activity in L4 is not required for the onset of adult behavior.  
34 Instead, the accumulation of eggs in the adult uterus renders the muscles sensitive to  
35 HSN input. Sterilization or acute electrical silencing of the vulval muscles inhibits  
36 presynaptic HSN activity, and reversal of muscle silencing triggers a homeostatic  
37 increase in HSN activity and egg release that maintains ~12-15 eggs in the uterus.  
38 Feedback of egg accumulation depends upon the vulval muscle postsynaptic terminus,  
39 suggesting a retrograde signal sustains HSN synaptic activity and egg release. Thus,  
40 circuit development and activity is necessary but not sufficient to drive behavior without  
41 additional modulation by sensory feedback.

42

43 **Key Words**

44 Neural circuit, development, *C. elegans*, calcium, serotonin, neuromodulation, behavior

45

46

47

48 **Significance**

49 The functional importance of early, spontaneous neuron activity in synapse and circuit  
50 development is not well understood. Here we show that in the nematode *C. elegans*, the  
51 serotonergic Hermaphrodite Specific Neurons (HSNs) and postsynaptic vulval muscles  
52 show activity during circuit development, well before the onset of adult behavior.  
53 Surprisingly, early activity is not required for circuit development or the onset of adult  
54 behavior, and the circuit remains unable to drive egg laying until fertilized embryos are  
55 deposited into the uterus. Egg accumulation potentiates vulval muscle excitability, but  
56 ultimately acts to promote burst firing in the presynaptic HSNs. Our results suggest that  
57 mechanosensory feedback acts at three distinct steps to initiate, sustain, and terminate  
58 *C. elegans* egg-laying circuit activity and behavior.

59

## 60 Introduction

61 Developing neural circuits in the cortex, hippocampus, cerebellum, retina and  
62 spinal cord show spontaneous neural activity (1-5). In contrast, mature neural circuits  
63 show coordinated patterns of activity which are required to drive efficient behaviors.  
64 Activity-dependent mechanisms have been shown to play key roles during synapse  
65 formation and early neuronal development in vertebrates (6-10), but the complexity of  
66 such circuits poses limitations in terms of understanding how developmental events,  
67 neurotransmitter expression, and sensory signals act together to promote the transition  
68 from immature to mature patterns of circuit activity. Genetically tractable invertebrate  
69 model organisms, such as the nematode *Caenorhabditis elegans*, have simple neural  
70 circuits and are amenable to powerful experimental approaches allowing us to  
71 comprehensively investigate how activity in neural circuits is shaped during development  
72 and transitions to mature patterns of activity that drive behaviors.

73 The *C. elegans* egg laying circuit is a well-characterized neural circuit that drives  
74 a two-state behavior in adult animals with ~20 minute inactive periods punctuated by ~2  
75 minute active states where ~5 eggs are laid (11). The egg-laying circuit consists of two  
76 serotonergic Hermaphrodite Specific Neurons (HSN) which promote the active state (11,  
77 12), three locomotion motor neurons (VA7, VB6, and VD7) which may drive rhythmic input  
78 into the circuit (13), and six cholinergic Ventral C neurons (VC1-6), all of whom synapse  
79 onto a set of vulval muscles that contract to release eggs from the uterus (14). The *C.*  
80 *elegans* vulva develops post-embryonically into a toroidal organ that allows for the release  
81 of developing embryos into the external environment (15, 16). Four uv1 neuroendocrine  
82 cells connect the vulva canal to the uterus which holds embryos until they are laid.

83 HSN, VC, uv1, and vulval muscle development occurs during the early-mid L4  
84 larval stages and requires interactions with the developing vulval epithelium, but not the  
85 other cells in the circuit (17-20). HSN-expressed SYG-1 interacts with SYG-2 expressed  
86 on the primary vulval epithelial cells, allowing proper HSN synapse placement (19, 20).  
87 The neurexin-related molecule BAM-2 is also expressed on the primary vulval epithelial  
88 cells and helps terminate VC4 and VC5 axon branching at the vulva (18). Extensions of  
89 the anterior and posterior vm2 vulval muscles, referred to as the lateral muscle arms,  
90 develop along the junction of the primary and secondary vulval epithelial cells, forming  
91 synapses with the HSN and VC boutons (21). LIN-12/Notch signaling in the vulval  
92 muscles directs the development of these vm2 muscle arms. Animals deficient in LIN-  
93 12/Notch signaling fail to develop vm2 muscle arms and are consequently egg-laying  
94 defective as adults because anterior and posterior vulval muscle contractility is  
95 asynchronous (21). Animals lacking HSNs or serotonin have prolonged egg-laying  
96 inactive states, indicating that serotonin modulates the onset of the egg laying active state  
97 (11). Serotonin released from the HSNs signals through vulval muscle receptors (22-26),  
98 likely increasing the electrical excitability of the muscles so that rhythmic input from  
99 cholinergic motor neurons can drive weak vulval muscle twitching or strong egg-laying  
100 contractions (13, 14, 27). Because each cell in the circuit develops independently in  
101 juveniles, how this circuit goes on to develop the robust pattern of coordinated activity  
102 seen in egg-laying adults remains unclear.

103 We have previously shown that HSN  $Ca^{2+}$  transients occur more frequently during  
104 the active state, but the factors which promote this timely 'feed-forward' increase in HSN  
105 activity remain poorly understood. The cholinergic VCs show little or no activity outside of

106 the active state. Within the active state, the VCs have rhythmic  $\text{Ca}^{2+}$  transients coincident  
107 with vulval muscle contractions, although whether VC activity drives contraction itself or  
108 instead acts to modulate HSN signaling is still not clear (28-31). The VCs also make  
109 synapses onto the body wall muscles, and optogenetic activation of the VCs leads to  
110 hypercontraction, suggesting that ACh released from VC might slow locomotion at the  
111 moment of egg release. Like the VCs, the uv1 neuroendocrine cells are active during egg  
112 laying. The uv1 cells, mechanically deformed by the passage of eggs through the vulva,  
113 release tyramine and neuropeptides that signal extrasynaptically to inhibit HSN activity  
114 (13, 32). Muscle activity in sterilized animals resembles that seen in the inactive state,  
115 suggesting that feedback of egg production or accumulation may influence whether and  
116 when animals enter the egg-laying active state.

117 Here, we leverage the experimental accessibility of the egg-laying circuit to  
118 investigate the relationship between cell activity, circuit development, and behavior  
119 development. We find the presynaptic HSN motor neurons and the postsynaptic vulval  
120 muscles are active during the late L4 larval stage, well before egg production and the  
121 onset of adult egg-laying behavior. We do not observe activity in the VC neurons and uv1  
122 neuroendocrine cells until behavioral onset. The adult circuit remains in a non-functional  
123 state until receiving feedback that sufficient eggs have accumulated in the uterus. This  
124 egg-laying homeostat requires the vm2 muscle arms and muscle activity which promote  
125 HSN burst firing that maintains the active state. Together, our data show how cell activity  
126 patterns that emerge during development are modulated by sensory feedback that decide  
127 when and for how long to drive behavior.

128

## 129 **Results**

130 **Asynchronous presynaptic and postsynaptic development in the *C. elegans* egg-**  
131 **laying behavior circuit.** We have previously described the function of cell activity in the  
132 adult egg-laying behavior circuit and how developmental mutations impact circuit activity  
133 and adult behavior (13, 21, 27). Because development of the cells in the circuit is  
134 complete by the end of the fourth larval (L4) stage (33), we wanted to determine the  
135 relationship between cell activity and circuit development in juveniles and compare early  
136 activity to that seen in egg-laying adults. We exploited the stereotyped morphology of the  
137 developing primary and secondary vulval epithelial cells in the fourth (final) larval stage  
138 to define discrete half-hour stages of development as described (34). Fig. S1A-D shows  
139 vulval morphologies during the transition from L4.7 to L4.9 just prior to the L4-adult molt.  
140 The L4.7-8 larval transition lasted for ~1 hour, transitioning into the L4.8 ~0.5 h after Fig.  
141 S1B (right panel). The vulval lumen began to shrink in L4.8 and was fully collapsed by  
142 L4.9, ~0.5h later (Fig. S1C-D) (34). Vulval development was complete at the time of the  
143 final molt (Fig. S1E), and a fully formed vulva could be seen after cuticle shedding (Fig.  
144 S1F).

145 We find that HSN morphological and pre-synaptic development is complete prior  
146 to late L4 larval stages, confirming previous observations (17, 19, 20, 35). We expressed  
147 mCherry in HSNs from the NLP-3 neuropeptide promoter. We confirmed that the HSN  
148 axon had fasciculated and developed enlarged anterior and posterior synaptic boutons in  
149 L4.7-8 and L4.9 animals (arrowheads in Fig.1A and B). This organization is nearly  
150 identical to the HSN morphology seen in adults except that we sometimes detect a dorsal  
151 extension in adult animals that develops toward the position of the uv1 neuroendocrine

152 cells (third arrowhead in Fig.1C). GFP::*RAB-3* expressed in HSN from the *unc-86*  
153 promoter showed clear punctate localization at synaptic sites in late L4 animals (Fig.1D  
154 and E), similar to that seen in adults (Fig.1F), suggesting that HSN presynaptic  
155 development is largely complete by L4.7-8.

156 Unlike HSNs, we found the post-synaptic vulval muscles completed their  
157 morphological development during the L4.9 stage, just prior to the L4 molt. We expressed  
158 mCherry in the vulval muscles from the *ceh-24* promoter (36) and found that the vm1 and  
159 vm2 vulval muscles were still developing at the L4.7-8 stage (Fig. 1G). After lumen  
160 collapse at the L4.9 stage, the tips of the vm1 muscles extended ventrally to the lips of  
161 the vulva, and the anterior and posterior vm2 muscle arms extended laterally along the  
162 junction between the primary and secondary vulval epithelial cells (Fig. 1H), making  
163 contact with each other at the HSN (and VC) synaptic release sites that continues in  
164 adults (Fig. 1I). Previous work has shown that mutations that disrupt LIN-12/Notch  
165 signaling perturb development of the vm2 muscle arms in late L4 animals, during the time  
166 when we observed vm2 muscle arm extension (21).

167 Vulval muscles express multiple receptors that might respond to serotonin  
168 released from HSN (22-26). In order to look at the developmental expression pattern of  
169 one such serotonin receptor, we examined a transgenic reporter line expressing GFP  
170 under the *ser-4b* gene promoter (37, 38). As shown in Fig 1J and 1K, we observed strong  
171 GFP expression in VulF and VulE primary and VulD secondary epithelial cells (20, 21).  
172 The *ser-4b* promoter also drove weak GFP expression in the vm2 muscles in L4.7-9, and  
173 this was elevated in adults (Fig. 1J-L). Previous serial EM reconstruction showed that  
174 HSN makes transient synapses onto the vulval epithelial cells in developing L4 animals



175 (20). Serotonin signaling through SER-4 may allow HSN (and possibly VC4 and VC5) to  
176 form temporary synapses onto the vulval epithelial cells until the vm2 muscle arms  
177 complete their lateral extension and form synapses. Consistent with this, *ser-4b*  
178 expression in adult animals was limited to the vm2 muscles (Fig. 1L). Lastly, we wanted  
179 to determine whether the VC motor neurons and uv1 neuroendocrine cells had completed  
180 their development in late L4 animals. To simultaneously visualize HSN, VC, and the uv1  
181 neuroendocrine cells, we expressed mCherry from the *ida-1* promoter, a gene expressed  
182 in a subset of peptidergic cells, including those in the egg-laying circuit (39). As expected,  
183 HSN and VC presynaptic termini assembled at the junction between the primary and  
184 secondary vulval epithelial cells in L4.7-8. The uv1 cells were positioned laterally to the  
185 HSN/VC synaptic regions and extended dorsal processes around the primary vulval  
186 epithelial cells (Fig.1 M-O). These results indicate that the morphological development of  
187 the HSN, VC, and uv1 cells is largely complete by L4.7-8 stage. In contrast, vulval muscle  
188 development continues until after the L4.9 stage when the vm2 muscle arms reach each  
189 other and the HSN and the VC presynaptic boutons.

190 **HSNs switch from tonic activity in juveniles to burst firing in egg-laying adults.** We  
191 next wanted to determine if the HSNs show activity as they develop and how that activity  
192 compares to that seen in egg-laying adults. To follow HSN activity, we expressed the Ca<sup>2+</sup>  
193 reporter GCaMP5 along with mCherry in HSN using the *nlp-3* promoter and performed  
194 ratiometric Ca<sup>2+</sup> imaging as previously described (13). Starting at the L4.7-8 larval stage,  
195 we observed rhythmic Ca<sup>2+</sup> activity in both HSN presynaptic termini and in the soma (Fig.  
196 2A and 2B). During the L4.9 larval stage, when animals exhibited behavioral features of  
197 the developmentally timed L4 quiescence (40), rhythmic Ca<sup>2+</sup> activity in HSNs slowed

198 (Fig. 2B; Movie S1). In adult animals, HSNs showed only infrequent activity during the  
199 egg-laying inactive state, but HSN activity switched to burst firing as animals entered the  
200 active state (Fig. 2B; Movie S2). We quantitated changes in HSN Ca<sup>2+</sup> transient peak  
201 amplitude and frequency during the different developmental stages and behavior states.  
202 We found no significant differences in HSN Ca<sup>2+</sup> transient amplitude (Fig. 2C), but we did  
203 observe significant changes in frequency. The median inter-transient interval in L4.7-8  
204 animals was ~34s, and this interval increased to ~60s as animals reached the L4.9 stage  
205 (Fig. 2D). The reduction of HSN transient frequency seen in L4.9 animals resembled the  
206 egg-laying inactive state. However, none of the developmental stages recapitulated the  
207 'burst' Ca<sup>2+</sup> activity with <20 s inter-transient intervals seen during the egg-laying active  
208 state (Fig. 2D). Together, these results indicate that the HSNs show tonic Ca<sup>2+</sup> activity  
209 once their morphological development is complete. HSN activity then switches into  
210 distinct inactive and active states as animals become egg-laying adults.

211         The onset of Ca<sup>2+</sup> activity in the HSN neurons during the late L4 stage coincided  
212 with changes in animal locomotion, pharyngeal pumping, and defecation behaviors that  
213 accompany the L4 lethargus (40). Tonic HSN Ca<sup>2+</sup> activity observed during late L4 was  
214 suppressed after the completion of the molt. In adults, serotonin release from the HSNs  
215 onto the AVF interneurons in the nerve ring has been shown to increase locomotor  
216 arousal during the egg-laying active state (41). We find the frequency of HSN transients  
217 decreases as L4.9 animals enter lethargus, consistent with a reduction in overall arousal  
218 and locomotion behavior. The ~50s rhythm of HSN activity in L4.9 animals resembles the  
219 defecation rhythm, prompting us to investigate whether there is a relationship between  
220 HSN activity and the defecation motor program (DMP). We found that defecation intervals

221 in L4.7-8 and adult animals were significantly longer when they were accompanied by  
222 one or more HSN  $\text{Ca}^{2+}$  transients (Fig. S2A and S2B). HSNs make and receive synapses  
223 from the excitatory GABAergic AVL motoneuron that regulates defecation, and serotonin  
224 and  $\text{G}\alpha_o$  signaling have previously been shown to inhibit defecation behavior (14, 42).  
225 However, we found that optogenetic activation of the HSN neurons did not affect the  
226 defecation rhythm in L4 or adult animals (Fig. S2C). Two independent mutants lacking  
227 HSNs showed a significant decrease in DMP frequency (Fig. S2D), although this  
228 defecation phenotype was not observed in *egl-47(dm)* animals which also reduce HSN  
229 neurotransmitter release (43). The egg-laying and defecation circuits both drive expulsion  
230 behaviors and are regulated by a common set of signaling molecules (44), but a role for  
231 HSN in coordinating these behaviors will require further study.

232 **Vulval muscles  $\text{Ca}^{2+}$  transients increase in strength and frequency during**  
233 **development.** Since HSN promotes vulval muscle activity and egg laying in adults, we  
234 wanted to determine if the HSN activity we observe in L4.7-8 and L4.9 animals drives  
235 early vulval muscle activity. We used the *ceh-24* promoter to drive expression of GCaMP5  
236 and mCherry in the vulval muscles of L4 animals. We detected  $\text{Ca}^{2+}$  transients in the  
237 vulval muscles at the L4.7-8 larval stage (Fig. 3A; Movie S3), and these transients  
238 continued in L4.9 animals at increased frequency (Fig. 3B-G; Movies S4 and S5). The  
239 median interval between vulval muscle  $\text{Ca}^{2+}$  transients was ~32 s in L4.7-8 animals which  
240 dropped to 18 s in L4.9 animals. We compared juvenile activity to that seen in adults (Fig.  
241 3D and 3E; Movie S6). Distributions of L4.9  $\text{Ca}^{2+}$  transients were not significantly different  
242 from vulval muscle twitch transients seen in adults during the egg-laying inactive state  
243 (Fig. 3G). In contrast, the frequency of vulval muscle  $\text{Ca}^{2+}$  transients increased

244 significantly in animals during the egg-laying active state with median intervals dropping  
245 to ~7s phased with each body bend (Fig. 3G; (13)). We found that vulval muscle  $\text{Ca}^{2+}$   
246 transients also become stronger during development. While  $\text{Ca}^{2+}$  transient amplitudes in  
247 the L4.7-8 and L4.9 stages were not significantly different, inactive phase  $\text{Ca}^{2+}$  transients  
248 of adults were stronger than those observed in L4 animals (Fig. 3H). In adult animals,  
249 strong  $\text{Ca}^{2+}$  transients were observed during the egg-laying active states, with the  
250 strongest  $\text{Ca}^{2+}$  transients driving the complete and simultaneous contraction of anterior  
251 and posterior vulval muscles to allow egg release (Fig. 3E and H).

252 We were surprised that vulval muscle transient frequencies decreased in adults as  
253 circuit activity bifurcated into distinct inactive and active egg-laying behavior states. Based  
254 on previous studies, we quantified periods of increased activity by measuring time spent  
255 with vulval muscle  $\text{Ca}^{2+}$  transient intervals less than one minute (27). We found that vulval  
256 muscle activity increased as L4.7-8 animals developed into L4.9 animals but then  
257 dropped significantly in egg-laying adults. L4.7-8 animals on average spent ~50% of their  
258 time in periods of increased vulval muscle activity, and this increased to 85% as animals  
259 entered the L4.9 stage (Fig. 3I). In contrast, adult animals spent only about ~33% of their  
260 time in periods with elevated vulval muscle activity (Fig. 3I) about half of which were  
261 coincident with the ~3 minute egg-laying active states that occur about every 20 minutes  
262 (11). What depresses vulval muscle activity in adult animals? We have previously shown  
263 that ERG  $\text{K}^+$  channels inhibit vulval muscle excitability and egg-laying behavior (27). We  
264 found that expression of ERG from the vulval muscle-specific *unc-103e* promoter is low  
265 in L4 animals and increases as animals become adults (data not shown), providing a

266 molecular basis for the suppression of vulval muscle activity in adults that underlies  
267 distinct inactive and active egg-laying behavior states.

268 **Development of coordinated vulval muscle activity for egg laying.** Egg release  
269 through the vulva requires the synchronous contraction of the anterior (A) and posterior  
270 (P) vulval muscles (Fig. 3E). Previous work has shown that loss of Notch signaling blocks  
271 postsynaptic vm2 muscle arm development in L4 animals resulting in asynchronous  
272 vulval muscle contractility and defects in egg-release in adults (21). Because of the vulval  
273 slit, the lateral vm2 muscle arms that develop between L4.7-8 and L4.9 form the only sites  
274 of potential contact between the anterior and posterior vulval muscles (Fig. 1M and 1N)  
275 (13, 21). To determine the relationship between vulval muscle morphology and activity,  
276 we examined the spatial distribution of vulval muscle Ca<sup>2+</sup> during identified transients. We  
277 found that only 5% of vulval muscle Ca<sup>2+</sup> transients were coordinated in the L4.7-8 stage  
278 (Fig. 3A; Movie S3), with nearly all transients occurring in either the anterior or posterior  
279 muscles (Fig. 3F and 3J). The degree of vulval muscle coordination increased  
280 significantly to ~28% of transients during L4.9 (Fig. 3J; compare Movies S4 and S5) a  
281 time when vm1 and vm2 muscles, as well as vm2 muscle arms, complete their  
282 development (compare Fig. 1M and 1N). This level of coordinated muscle activity was not  
283 significantly different to that found in adult animals during the egg-laying inactive state  
284 (Fig. 3J; compare Fig. 3C and 3D). During the egg-laying active state ~60% of vulval  
285 muscle transients were found to be coordinated, with Ca<sup>2+</sup> transients occurring  
286 synchronously in the anterior and posterior muscles (Movie S6). To test whether HSN  
287 activity was required for the development of coordinated muscle activity, we analyzed  
288 muscle activity in animals missing the HSNs. Surprisingly, we observed that vulval

289 muscles develop wild-type levels of coordinated activity even without HSN input (Fig. 3J).  
290 We have previously shown that vulval muscle activity is phased with locomotion, possibly  
291 via rhythmic ACh release from the VA7 and VB6 motor neurons onto the vm1 muscles  
292 (13). Our results suggest that coordination of vulval muscle activity that develops by the  
293 L4.9 stage, is independent of HSN input, and may instead be a consequence of A/P  
294 muscle contact along the vulval slit and driven by input from the locomotion central pattern  
295 generator.

296 **Early neuronal and vulval muscle activity is not required for the onset of adult egg-**  
297 **laying behavior.** Activity in developing circuits has previously been shown to contribute  
298 to mature patterns of activity that drive behavior. Is the activity we observe in HSN and  
299 vulval muscles required for the proper onset of egg-laying behavior in adults? To test this,  
300 we first set out to determine when adults initiate egg laying. Wild-type animals laid their  
301 first egg at about ~6-7h after the L4-adult molt (Fig. 4A), a time when we first observed  
302 VC and uv1  $Ca^{2+}$  activity (data not shown). At this stage, animals had typically  
303 accumulated ~8-10 eggs in the uterus. Animals without HSNs laid their first egg much  
304 later, ~18 hours post molt (Fig. 4A). Gain-of-function receptor mutations which increase  
305 inhibitory  $G\alpha_o$  signaling in the HSNs (12, 29, 43) showed a delay in egg release until ~15-  
306 17h after the L4 molt (Fig. 4A), resembling animals without HSNs. Surprisingly,  
307 tryptophan hydroxylase (*tph-1*) knockout animals which are unable to synthesize  
308 serotonin showed a small but significant delay in egg release compared to wild type (~7-  
309 8h post L4 molt), suggesting that HSN promotes egg laying via release of  
310 neurotransmitters other than serotonin.

311 To silence HSN and vulval muscle activity acutely and reversibly, we expressed  
312 *Drosophila* Histamine-gated chloride channels (HisCl) using cell-specific promoters and  
313 tested how histamine affected egg-laying behavior (45). Egg laying was unaffected by  
314 exogenous histamine in non-transgenic animals but was potently inhibited when HisCl  
315 channels were transgenically expressed in the HSNs, the vulval muscles, or in the entire  
316 nervous system (Fig. 4B). Silencing these cells in late L4 animals for the entire period  
317 where we observe activity caused no significant changes in the onset of adult egg laying  
318 after histamine washout in molted adults (Fig. 4C). We also observed no change in the  
319 steady-state number of unlaidd eggs in the uterus after developmental silencing of L4  
320 animals with histamine (data not shown). These results suggest that presynaptic and  
321 postsynaptic activity in the developing circuit is not required for circuit development or  
322 behavior.

323 **Unlaidd eggs promote vulval muscle responsiveness to HSN activity.** We have  
324 previously shown that optogenetic activation of the HSNs in adult animals is sufficient to  
325 induce egg-laying circuit activity and behavior (13). Despite the fact that both the HSNs  
326 and vulval muscles show activity in L4.9 animals, egg laying does not begin until 6-7 hours  
327 later when the animals have accumulated ~8-10 unlaidd eggs in the uterus. In order to  
328 dissect the relationship between egg production and circuit activity, we tested when the  
329 vulval muscles develop sensitivity to HSN input. We optogenetically activated the HSNs  
330 using Channelrhodopsin-2 (ChR2) while simultaneously recording Ca<sup>2+</sup> activity in the  
331 vulval muscles at 3 stages: in L4.9 juveniles and in 3.5 h and 6.5 h adults. L4.9 animals  
332 have no eggs in the uterus, 3.5-hour adults contained 0-1 unlaidd eggs, while 6.5-hour old  
333 adults had accumulated ~8-10 eggs. Stimulating HSNs in L4.9 juveniles or in 3.5-h adults

334 failed to induce detectable changes in vulval muscle  $\text{Ca}^{2+}$  activity (Fig. 5A, 5B, 5D). In  
335 contrast, optogenetic activation of HSNs in 6.5-hour adults significantly increased vulval  
336 muscle  $\text{Ca}^{2+}$  activity and triggered egg laying (Fig. 5C and 5D). The number of eggs in  
337 the uterus dictated the vulval muscle response to HSN activation. L4.9 or 3.5-hour adults  
338 with 0-1 eggs in the uterus had a mean transient frequency of  $\leq 100$  mHz, similar to the  
339 response seen in 6.5-hour adult animals with  $\sim 8$  eggs grown without ATR. The vulval  
340 muscle  $\text{Ca}^{2+}$  response to HSN input was increased to  $\sim 170$  mHz in 6-hour adults with  $\sim 8$   
341 unlaidd eggs (Fig. 5E). The vulval muscles in serotonin-deficient mutants had a normal  
342 response to HSN activation at 6.5 hours (Fig. S3A-C), consistent with the normal onset  
343 of egg laying in these mutants (Fig. 4A). Together, these results show that the vulval  
344 muscles do not respond to HSN input until  $\sim 6.5$  hours after the molt when fertilized  
345 embryos begin to accumulate in the uterus.

346 We next examined whether this change in vulval response in older adults was  
347 caused by ongoing developmental events or was instead a consequence of egg  
348 accumulation. We previously demonstrated that adults sterilized with FUDR, a chemical  
349 blocker of germline cell division and egg production, showed inactive state levels of vulval  
350 muscle activity (13). We found that vulval muscles in FUDR-treated animals were  
351 significantly less responsive to HSN optogenetic stimulation (Fig. 6A and 6B). The  
352 residual vulval muscle response in FUDR-treated animals is likely caused by incomplete  
353 sterilization when FUDR is added to L4.9 animals. We interpret these results as indicating  
354 that egg accumulation, not circuit maturity, modulates the onset of the egg-laying active  
355 state.



356 **A retrograde signal of egg accumulation and vulval muscle activity drives**  
357 **presynaptic HSN activity.** HSN activity can be inhibited by external sensory signals and  
358 feedback of egg release (12, 13, 29, 32), but the factors that promote HSN activity are  
359 not clear. We tested whether egg accumulation promotes circuit activity through the  
360 presynaptic HSNs, the postsynaptic vulval muscles, or both. We found that HSN Ca<sup>2+</sup>  
361 activity, particularly the burst firing activity associated with the active state, was  
362 dramatically reduced in FUDR-treated animals (Fig. 7A). Although we did observe single  
363 HSN Ca<sup>2+</sup> transients in FUDR treated animals, the intervals between were prolonged,  
364 often minutes apart (Fig. 7C). We quantified the total time spent by animals with HSN  
365 Ca<sup>2+</sup> transient intervals <30s apart as a measure of HSN burst-firing seen in the active  
366 state. We found that while untreated animals spent ~13% of their time with the HSNs  
367 showing high-frequency activity, such bursts were eliminated in FUDR-treated animals  
368 (Fig. 7D). This result shows that feedback of egg production or accumulation modulates  
369 the frequency of HSN activity.

370 We performed a reciprocal experiment to test how electrical silencing of the  
371 postsynaptic vulval muscles affects presynaptic HSN activity. We have previously shown  
372 that passage of eggs through the vulva mechanically activates the uv1 neuroendocrine  
373 cells which release tyramine and neuropeptides that inhibit HSN activity and egg laying  
374 (13, 32). We hypothesized that prevention of egg release would block inhibitory uv1  
375 feedback and increase HSN activity. We expressed HisCl channels in the vulval muscles  
376 and recorded HSN Ca<sup>2+</sup> activity after silencing with exogenous histamine. Surprisingly,  
377 we found that acute silencing of vulval muscles significantly reduced presynaptic HSN  
378 Ca<sup>2+</sup> activity, resembling FUDR treatment (Fig. 7B and 7C). While untreated animals

379 spent ~16% of recording time with high frequency HSN activity, this was reduced to ~2%  
380 of the total recording time in histamine-treated animals (Fig. 7D). These results indicate  
381 that vulval muscle activity is required for the burst firing in the HSN neurons that  
382 accompanies the egg-laying active state.

383 We next looked at how HSN Ca<sup>2+</sup> activity recovers when histamine inhibition of the  
384 vulval muscles and egg laying is reversed. As shown in Fig. 8A, adult animals were  
385 treated with or without histamine for 3-4 hours and then moved to plates without histamine  
386 for a 20-30 minutes recovery period. Presynaptic HSN Ca<sup>2+</sup> activity was then recorded as  
387 the animals resumed egg-laying behavior. The HSNs showed a rapid and dramatic  
388 recovery of Ca<sup>2+</sup> activity after histamine washout resulting in a prolonged active state with  
389 increased HSN Ca<sup>2+</sup> transient frequency and numerous egg-laying events (Fig. 8A and  
390 8B). Washout animals spent ~40% of their recorded time with elevated HSN activity  
391 compared to 15% of untreated controls (Fig. 8C). During this recovery period, we  
392 observed increased vulval muscle twitching contractions in the bright field channel,  
393 indicating that muscle activity was restored (data not shown). These results suggest that  
394 accumulation of unlaidd eggs promotes vulval muscle activity which drives a homeostatic  
395 increase in burst-firing pattern of HSN activity that sustains egg laying.

396 HSN synapses are formed exclusively on the vm2 muscle arms that provide sites  
397 of contact between the anterior and posterior vulval muscles (14, 21, 27). Hypomorphic  
398 Notch signaling mutants fail to develop vm2 muscle arms, and are egg-laying defective,  
399 but have normal pre-synaptic HSN and VC development (21, 46). To determine if  
400 retrograde signaling to the HSNs occurs through the vm2 muscle arms, we recorded HSN  
401 Ca<sup>2+</sup> activity in *lin-12(wy750)* Notch receptor mutant animals that are missing the vm2

402 muscle arms (Fig. 9A and 9B). We found that HSN Ca<sup>2+</sup> transient frequency was strongly  
403 reduced in the *lin-12(wy750)* mutants compared to wild-type control animals (Fig. 9C and  
404 9D). HSN Ca<sup>2+</sup> transients still occurred in this mutant, but burst-firing was eliminated.  
405 Wild-type animals spent ~13% of their time with HSN transients <30s apart, while in the  
406 *lin-12(wy750)* mutant this was zero (Fig. 9E), resembling activity seen in FUDR-sterilized  
407 or vulval muscle-silenced animals. Together, these results indicate that muscle activity  
408 feeds back through the vm2 muscle arms onto the pre-synaptic HSN neurons to promote  
409 additional Ca<sup>2+</sup> transients that drive burst firing and sustain the egg-laying active state.

410

## 411 **Discussion**

412 We used a combination of molecular genetic, optogenetic, and ratiometric Ca<sup>2+</sup> imaging  
413 approaches to determine how coordinated activity develops in the *C. elegans* egg-laying  
414 behavior circuit. We find the pre-synaptic HSNs, VCs, and uv1 neuroendocrine cells  
415 complete morphological development in the early-mid L4 stages, while the vulval muscles  
416 finish developing at the late L4 stages. Like HSNs, the vulval muscles show Ca<sup>2+</sup> activity  
417 in the L4.7-8 stage. Coordinated vulval muscle Ca<sup>2+</sup> transients are not observed until the  
418 L4.9 stage, a time when the anterior and posterior vm2 muscle arms complete a Notch-  
419 dependent lateral extension around the primary vulval epithelial cells (21). We do not  
420 observe Ca<sup>2+</sup> activity in the VC neurons and uv1 cells except in egg-laying adults (data  
421 not shown) suggesting activity in these cells does not contribute to circuit development.  
422 In adults, the juvenile HSN and vulval muscle activity disappears, leading to the  
423 establishment of characteristic 'inactive' states in which adult animals spend ~85% of their

424 time. Inactive state activity closely resembles that seen in sterilized animals that do not  
425 accumulate any eggs. We propose that uterine cells depress or excite the vulval muscles  
426 depending on the degree of stretch. Activation of the uterine muscles, which make gap  
427 junctions onto the vm2 muscles, would increase vulval muscle sensitivity to serotonin and  
428 other neurotransmitters released from HSN, which subsequently allows for rhythmic ACh  
429 input from the VA/VB locomotion motor neurons to drive vulval muscle  $Ca^{2+}$  activity.  
430 Coordinated  $Ca^{2+}$  activity in the anterior and posterior vulval muscles diffuses into the  
431 vm2 muscle arms to restimulate the HSNs and prolong the egg-laying active state. VC  
432 activity is coincident with strong vulval muscle contractions, while uv1 activity follows  
433 passage of eggs through the vulva. Once sufficient eggs have been laid, excitatory  
434 feedback to the vulval muscles and HSNs is reduced, increasing the probability that  
435 tyramine and neuropeptides released from VC and uv1 will block subsequent HSN  $Ca^{2+}$   
436 transients, returning the circuit to the inactive state.

437 Changes in gene expression likely contribute to the changes in circuit activity  
438 patterns we observe between L4s and adults. Previous work has found that serotonin  
439 expression is low in L4 and increases as animals increase egg laying (47). Since mutants  
440 lacking serotonin have little effect on the timing of the first egg-laying event, we anticipate  
441 other neurotransmitters released from the HSNs promote egg laying in young adults.  
442 KCC-2 and ABTS-1, two  $Cl^-$  extruders required for inhibitory neurotransmission, show a  
443 developmental increase in HSN expression from L4 to adult (48, 49) which may be  
444 associated with the disappearance of spontaneous rhythmic activity in the HSNs after the  
445 late L4 stages. At the same time, we find that inhibitory ERG  $K^+$  channel expression  
446 becomes strongly upregulated in the vulval muscles young adults. Mechanical stimuli are

447 also important regulators of transcription in developmental process such as tissue  
448 patterning, cell fate determination, and differentiation (50). Studies in vertebrate models  
449 have shown that stretch can increase the transcription of receptors that enhance muscle  
450 contraction during parturition (51, 52). Cyclic stretch also regulates the expression of a  
451 tissue specific gene, myocardin, in vascular smooth muscle cells (53). We speculate that  
452 similar mechano-transcriptional mechanisms may operate in the *C. elegans* reproductive  
453 system to drive expression of receptors and channels that modulate vulval muscle  
454 sensitivity to presynaptic stimulation. Identifying additional genes whose expression  
455 increases upon egg accumulation could help explain how HSN-deficient animals enter  
456 the egg-laying active state.

457         The HSNs show dramatic changes in  $\text{Ca}^{2+}$  transient frequency between the  
458 inactive and active states with little or no difference in transient amplitude. Previous work  
459 has shown that the major G proteins,  $\text{G}\alpha_q$  and  $\text{G}\alpha_o$ , signal in HSN to increase and inhibit  
460 egg laying, respectively (29, 47). G protein signaling in HSN may modulate an intrinsic  
461 pacemaker activity, similar to that seen in other central pattern generator circuits and in  
462 the cardiac pacemaker (54).  $\text{G}\alpha_o$  signaling in HSN activates inhibitory IRK  $\text{K}^+$  channels  
463 (12), and recent work has identified the T-type  $\text{Ca}^{2+}$  channel, CCA-1, and the  $\text{Na}^+$  leak  
464 channels, NCA-1 and NCA-2, as possible targets of excitatory  $\text{G}\alpha_q$  signaling (31, 55, 56).  
465 The balance of both G protein signaling pathways would allow for HSN frequency  
466 modulation and dictate whether animals enter or leave the egg-laying active state.

467         Early vulval muscle activity may be spontaneous or driven by neuronal input.  
468 Spontaneous  $\text{Ca}^{2+}$  transients promote the maturation of activity in many other cells (57).

469 We observed no change in behavioral onset or egg-laying rate in animals in which neuron  
470 or vulval muscle activity was silenced in the L4 stage. While this may result from  
471 incomplete silencing using the HisCl based approach, previous results indicate synapse  
472 development does not require  $\text{Ca}^{2+}$ -dependent excitatory transmission (58-60). While G  
473 protein signaling may drive early  $\text{Ca}^{2+}$  activity in the absence of electrical activity, synaptic  
474 transmission would still require  $\text{Ca}^{2+}$ -dependent vesicle fusion. The features of the vulval  
475 muscle  $\text{Ca}^{2+}$  transients we observe in juveniles are largely identical to that seen in adults.  
476 The persistence of activity in animals that lack HSNs or neural activity suggests they arise  
477 from a shared mechanism that is not required for synapse development and/or recovers  
478 quickly after histamine washout.

479 Our work continues to show the functional importance of the post-synaptic vm2  
480 muscle arms in coordinating muscle activity during egg-laying behavior. Because of the  
481 intervening vulval slit through which eggs are laid, the vm2 muscle arms are the only sites  
482 of contact between the anterior and posterior muscles. Coordinated muscle  $\text{Ca}^{2+}$   
483 transients appear during the L4.9 larval stage after vm2 muscle arm development. After  
484 development, the vm2 muscle arms may be electrically coupled at their points of contact,  
485 allowing for the immediate spread of electrical activity and/or  $\text{Ca}^{2+}$  signals between the  
486 anterior and posterior muscles. Mutants where the vm2 muscle arms fail to develop still  
487 have vm1 and vm2  $\text{Ca}^{2+}$  activity, but this activity is uncoordinated (21). Additionally, these  
488 mutants do not show regenerative HSN  $\text{Ca}^{2+}$  activity, resembling the consequences of  
489 vulval muscle electrical silencing. The vm2 muscle arms also mediate synaptic input from  
490 HSN and VC. We have previously shown that the ERG  $\text{K}^+$  channel and SER-1 serotonin  
491 receptor localize to the vm2 muscle arm region (21, 27). Both ERG and SER-1 have C-

492 terminal PDZ interaction motifs, and SER-1 has been shown to interact with the large  
493 PDZ scaffold protein MPZ-1 (61). Because gap junctions are potential targets of G protein  
494 signaling (62), innexin opening between neurons and muscles may facilitate the  
495 emergence of patterned ‘burst’ activity in the circuit that drives the egg-laying active state.

496 Neural circuits which generate directional movements during peristalsis, axial  
497 locomotion, and swimming rely on specialized central pattern generator (CPG) circuits  
498 which possess intrinsic rhythms (63). In these circuits, sensory feedback onto CPG micro-  
499 circuits as well as dedicated groups of interneurons regulate the spatio-temporal patterns  
500 of activation of motor neurons in adjacent body segments resulting in the sequential  
501 activation of muscles. Stretch signals and sensory feedback are essential for the  
502 coordination of activity in these cases. In *Drosophila*, the segmentally distributed GDL  
503 interneurons make synapses onto motor neurons which control wave propagation during  
504 larval locomotion. Feedback from stretch sensory neurons controls GDL activity and  
505 regulates the properties of wave propagation (64). In guinea-pigs, stretch-sensitive  
506 ascending and descending interneurons in the distal colon provide rhythmic excitatory  
507 and inhibitory inputs to enteric motor neurons during peristalsis (65). The *C. elegans* egg-  
508 laying system also appears to contain stretch-sensitive modalities, possibly relying on  
509 physiological mechanisms similar to those described above (66-68).

510 The VC motor neurons share key functional features of sensory neurons and  
511 interneurons which modulate CPG rhythms in other circuits. VC extends non-synaptic  
512 processes along the vulval hypodermis which could be mechanically activated by vulval  
513 muscle contraction (14, 18). The VC neurons make synapses onto both the vm2 vulval  
514 muscles and the body wall muscles. VC  $Ca^{2+}$  activity peaks at the moment of vulval

515 muscle contraction, but optogenetic activation of the VCs fails to elicit egg laying events  
516 and instead slows locomotion. Moreover, VC- and acetylcholine-defective mutants show  
517 increased egg laying (28, 29), suggesting a loss of inhibitory feedback. Thus, the VCs,  
518 instead of releasing acetylcholine at the vm2 synapse to drive vulval muscle contraction,  
519 may function in part as baroreceptors to slow locomotion during egg release (13). This  
520 mode of action is similar to the mechanosensory gastric-pyloric receptor (GPR) cells in  
521 crabs which are rhythmically activated by muscle movements in the foregut, and release  
522 ACh and serotonin onto CPG neurons in the stomatogastric ganglion (STG). This  
523 simultaneously elicits fast excitatory and slow modulatory changes in the firing properties  
524 of STG neurons (69). Our studies of the egg-laying circuit show that ongoing HSN activity  
525 depends on a signal released from the post-synaptic vulval muscles induced by stretch-  
526 dependent activation. Further studies of the egg-laying circuit should allow for the  
527 identification of the molecules and cells that drive this unique form of retrograde  
528 modulation of presynaptic activity.

529



## 530 **Materials and Methods**

### 531 **Nematode Culture and Developmental Staging.** *Caenorhabditis elegans*

532 hermaphrodites were maintained at 20°C on Nematode Growth Medium (NGM) agar  
533 plates with *E. coli* OP50 as a source of food as described (70). Animals were staged and  
534 categorized based on the morphology of the vulva as described in the results section. For  
535 assays involving young adults, animals were age-matched based on the timing of  
536 completion of the L4 larval molt. All assays involving adult animals were performed using  
537 age-matched adult hermaphrodites 20-40 hours past the late L4 stage.

### 538 **Confocal Microscopy and Ratiometric Ca<sup>2+</sup> Imaging.** To visualize the egg-laying

539 system, L4s and age-matched adults were immobilized using 10 mM muscimol on 4%  
540 agarose pads and covered with #1 coverslips. Two-channel confocal Z-stacks (along with  
541 a bright-field channel) using a pinhole opening of 1 Airy Unit (0.921µm thick optical  
542 sections, 16-bit images) were obtained with an inverted Leica TCS SP5 confocal  
543 microscope with a 63X Water Apochromat objective (1.2NA). Ca<sup>2+</sup> recordings were made  
544 using the 8kHz resonant scanner and the pinhole opened for ~20µm optical slices.  
545 Recordings were collected at ~20 fps at 256x256 pixel resolution, 12-bit depth and ≥2X  
546 digital zoom using a 20x Apochromat objective (0.7NA). GFP/GCaMP5 and mCherry  
547 fluorescence was excited using a 488 nm and 561 nm laser lines, respectively. L4 animals  
548 at the relevant stages of vulval development were identified based on vulval morphology  
549 (34). Adult recordings were performed 24 hours after the late L4 stage. Young adults  
550 (3.5–6.5 h) were staged after cuticle shedding at the L4 to adult molt. After staging,  
551 animals were allowed to adapt for ~30 min before imaging. During imaging, the stage and  
552 focus were adjusted manually to keep the relevant cell/pre-synapse in view and in focus.

553 Ratiometric analysis for all Ca<sup>2+</sup> recordings was performed using Volocity 6.3.1  
554 (Perkin Elmer) as described (13). The egg-laying active state was operationally defined  
555 as the period one minute prior to the first egg-laying event, and ending one minute after  
556 the last (in the case of a typical active phase where 3-4 eggs are laid in quick succession).  
557 However, in cases where two egg-laying events were apart by >60 seconds, peaks were  
558 considered to be in separate active phases and transients between these were  
559 considered to be from the inactive state. To facilitate comparisons of  $\Delta R/R$  between  
560 different reporters, developmental stages, and recording conditions, HSN recordings in  
561 which baseline GCaMP5/mCherry fluorescence ratio values were between 0.2-0.3 were  
562 selected for the analysis, while vulval muscle recordings with GCaMP5/mCherry ratio  
563 values between 0.1-0.2 were chosen ( $\geq 80\%$  of recordings). The coordination of vulval  
564 muscle contraction was determined as described (21).

565 **Behavior Assays and Microscopy.** ChR2 expressing strains were maintained on OP50  
566 with or without all-*trans* retinal (ATR) (0.4 mM). ChR2 was activated during Ca<sup>2+</sup> imaging  
567 experiments with the same laser light used to excite GCaMP5 fluorescence. For acute  
568 silencing assays, NGM plates containing 10 mM histamine were prepared and used as  
569 described (45). For adult behavioral assays, HisCl expressing strains were staged as late  
570 L4s with assays performed 24 hours later. For L4 activity silencing, L4.7 animals were  
571 placed on NGM plates with or without 10 mM histamine and were monitored to note when  
572 the animals complete the L4 molt. Each animal was then transferred to a new seeded  
573 plate, and the time for each animal to lay its first egg was recorded. Animals were  
574 sterilized using Floxuridine (FUDR); 100  $\mu$ l of 10mg/ml FUDR was applied to OP50

575 seeded NGM plates. Late L4 animals were then staged onto the FUDR plates and  
576 sterilized adults were imaged 24 hours later.

577 **Statistical Analysis.** Statistical analysis was performed using Prism 6 (GraphPad).  
578 Sample sizes for behavioral assays followed previous studies (13, 27, 71). Ca<sup>2+</sup> transient  
579 peak amplitudes, widths, and inter-transient intervals were pooled from multiple animals  
580 (typically ~10 animals per genotype/condition per experiment). Individual *p* values are  
581 indicated in each Figure legend, and all tests were corrected for multiple comparisons  
582 (Bonferroni for ANOVA; Dunn for Kruskal-Wallis).

583 **ACKNOWLEDGEMENTS.** This work was funded by a grant from NINDS to KMC (R01  
584 NS086932). JG was supported by the Bridge to the Baccalaureate Program (R25  
585 GM050083). Strains used in this study have been provided to the *C. elegans* Genetics  
586 Center, which is funded by NIH Office of Research Infrastructure Programs (P40  
587 OD010440). We thank Addy Bode and Michael Scheetz for help with strain construction.  
588 We thank James Baker, Julia Dallman, and members of the Collins lab and for helpful  
589 discussions and feedback.

590

591 **References:**

- 592 1. Garaschuk O, Hanse E, & Konnerth A (1998) Developmental profile and synaptic  
593 origin of early network oscillations in the CA1 region of rat neonatal hippocampus.  
594 *J Physiol* 507 ( Pt 1):219-236.
- 595 2. Garaschuk O, Linn J, Eilers J, & Konnerth A (2000) Large-scale oscillatory calcium  
596 waves in the immature cortex. *Nat Neurosci* 3(5):452-459.
- 597 3. Warp E, *et al.* (2012) Emergence of patterned activity in the developing zebrafish  
598 spinal cord. *Curr Biol* 22(2):93-102.
- 599 4. Watt AJ, *et al.* (2009) Traveling waves in developing cerebellar cortex mediated by  
600 asymmetrical Purkinje cell connectivity. *Nat Neurosci* 12(4):463-473.
- 601 5. Wong RO, Chernjavsky A, Smith SJ, & Shatz CJ (1995) Early functional neural  
602 networks in the developing retina. *Nature* 374(6524):716-718.
- 603 6. Borodinsky LN, *et al.* (2004) Activity-dependent homeostatic specification of  
604 transmitter expression in embryonic neurons. *Nature* 429(6991):523-530.
- 605 7. Gu X, Olson EC, & Spitzer NC (1994) Spontaneous neuronal calcium spikes and  
606 waves during early differentiation. *J Neurosci* 14(11 Pt 1):6325-6335.
- 607 8. Gu X & Spitzer NC (1995) Distinct aspects of neuronal differentiation encoded by  
608 frequency of spontaneous Ca<sup>2+</sup> transients. *Nature* 375(6534):784-787.
- 609 9. Hanson MG, Milner LD, & Landmesser LT (2008) Spontaneous rhythmic activity  
610 in early chick spinal cord influences distinct motor axon pathfinding decisions.  
611 *Brain Res Rev* 57(1):77-85.
- 612 10. Jarecki J & Keshishian H (1995) Role of neural activity during synaptogenesis in  
613 *Drosophila*. *J Neurosci* 15(12):8177-8190.

- 614 11. Waggoner LE, Zhou GT, Schafer RW, & Schafer WR (1998) Control of alternative  
615 behavioral states by serotonin in *Caenorhabditis elegans*. *Neuron* 21(1):203-214.
- 616 12. Emtage L, *et al.* (2012) IRK-1 potassium channels mediate peptidergic inhibition  
617 of *Caenorhabditis elegans* serotonin neurons via a G(o) signaling pathway. *J*  
618 *Neurosci* 32(46):16285-16295.
- 619 13. Collins KM, *et al.* (2016) Activity of the *C. elegans* egg-laying behavior circuit is  
620 controlled by competing activation and feedback inhibition. *Elife* 5:e21126.
- 621 14. White JG, Southgate E, Thomson JN, & Brenner S (1986) The structure of the  
622 nervous system of the nematode *Caenorhabditis elegans*. *Philos Trans R Soc*  
623 *Lond B Biol Sci* 314(1165):1-340.
- 624 15. Schindler AJ & Sherwood DR (2013) Morphogenesis of the *Caenorhabditis*  
625 *elegans* vulva. *Wiley Interdiscip Rev Dev Biol* 2(1):75-95.
- 626 16. Sternberg PW (2005) Vulval development. *WormBook*:1-28.
- 627 17. Adler CE, Fetter RD, & Bargmann CI (2006) UNC-6/Netrin induces neuronal  
628 asymmetry and defines the site of axon formation. *Nat Neurosci* 9(4):511-518.
- 629 18. Colavita A & Tessier-Lavigne M (2003) A Neurexin-related protein, BAM-2,  
630 terminates axonal branches in *C. elegans*. *Science* 302(5643):293-296.
- 631 19. Shen K & Bargmann CI (2003) The immunoglobulin superfamily protein SYG-1  
632 determines the location of specific synapses in *C. elegans*. *Cell* 112(5):619-630.
- 633 20. Shen K, Fetter RD, & Bargmann CI (2004) Synaptic specificity is generated by the  
634 synaptic guidepost protein SYG-2 and its receptor, SYG-1. *Cell* 116(6):869-881.

- 635 21. Li P, Collins KM, Koelle MR, & Shen K (2013) LIN-12/Notch signaling instructs  
636 postsynaptic muscle arm development by regulating UNC-40/DCC and MADD-2  
637 in *Caenorhabditis elegans*. *Elife* 2:e00378.
- 638 22. Carnell L, Illi J, Hong SW, & McIntire SL (2005) The G-protein-coupled serotonin  
639 receptor SER-1 regulates egg laying and male mating behaviors in *Caenorhabditis*  
640 *elegans*. *J Neurosci* 25(46):10671-10681.
- 641 23. Dempsey CM, Mackenzie SM, Gargus A, Blanco G, & Sze JY (2005) Serotonin  
642 (5HT), fluoxetine, imipramine and dopamine target distinct 5HT receptor signaling  
643 to modulate *Caenorhabditis elegans* egg-laying behavior. *Genetics* 169(3):1425-  
644 1436.
- 645 24. Dernovici S, Starc T, Dent JA, & Ribeiro P (2007) The serotonin receptor SER-1  
646 (5HT2ce) contributes to the regulation of locomotion in *Caenorhabditis elegans*.  
647 *Dev Neurobiol* 67(2):189-204.
- 648 25. Hapiak VM, *et al.* (2009) Dual excitatory and inhibitory serotonergic inputs  
649 modulate egg laying in *Caenorhabditis elegans*. *Genetics* 181(1):153-163.
- 650 26. Hobson RJ, *et al.* (2006) SER-7, a *Caenorhabditis elegans* 5-HT7-like receptor, is  
651 essential for the 5-HT stimulation of pharyngeal pumping and egg laying. *Genetics*  
652 172(1):159-169.
- 653 27. Collins KM & Koelle MR (2013) Postsynaptic ERG potassium channels limit  
654 muscle excitability to allow distinct egg-laying behavior states in *Caenorhabditis*  
655 *elegans*. *J Neurosci* 33(2):761-775.

- 656 28. Bany IA, Dong MQ, & Koelle MR (2003) Genetic and cellular basis for acetylcholine  
657 inhibition of *Caenorhabditis elegans* egg-laying behavior. *J Neurosci* 23(22):8060-  
658 8069.
- 659 29. Ringstad N & Horvitz HR (2008) FMRFamide neuropeptides and acetylcholine  
660 synergistically inhibit egg-laying by *C. elegans*. *Nat Neurosci* 11(10):1168-1176.
- 661 30. Schafer WR, Sanchez BM, & Kenyon CJ (1996) Genes affecting sensitivity to  
662 serotonin in *Caenorhabditis elegans*. *Genetics* 143(3):1219-1230.
- 663 31. Zang KE, Ho E, & Ringstad N (2017) Inhibitory peptidergic modulation of *C.*  
664 *elegans* serotonin neurons is gated by T-type calcium channels. *Elife* 6:e22771.
- 665 32. Banerjee N, Bhattacharya R, Gorczyca M, Collins KM, & Francis MM (2017) Local  
666 neuropeptide signaling modulates serotonergic transmission to shape the  
667 temporal organization of *C. elegans* egg-laying behavior. *PLoS Genet*  
668 13(4):e1006697.
- 669 33. Li C & Chalfie M (1990) Organogenesis in *C. elegans*: positioning of neurons and  
670 muscles in the egg-laying system. *Neuron* 4(5):681-695.
- 671 34. Mok DZ, Sternberg PW, & Inoue T (2015) Morphologically defined sub-stages of  
672 *C. elegans* vulval development in the fourth larval stage. *BMC Dev Biol* 15:26.
- 673 35. Patel MR, *et al.* (2006) Hierarchical assembly of presynaptic components in  
674 defined *C. elegans* synapses. *Nat Neurosci* 9(12):1488-1498.
- 675 36. Harfe BD & Fire A (1998) Muscle and nerve-specific regulation of a novel NK-2  
676 class homeodomain factor in *Caenorhabditis elegans*. *Development* 125(3):421-  
677 429.

- 678 37. Gurel G, Gustafson MA, Pepper JS, Horvitz HR, & Koelle MR (2012) Receptors  
679 and other signaling proteins required for serotonin control of locomotion in  
680 *Caenorhabditis elegans*. *Genetics* 192(4):1359-1371.
- 681 38. Tsalik EL & Hobert O (2003) Functional mapping of neurons that control  
682 locomotory behavior in *Caenorhabditis elegans*. *J Neurobiol* 56(2):178-197.
- 683 39. Cai T, Fukushige T, Notkins AL, & Krause M (2004) Insulinoma-Associated Protein  
684 IA-2, a Vesicle Transmembrane Protein, Genetically Interacts with UNC-31/CAPS  
685 and Affects Neurosecretion in *Caenorhabditis elegans*. *J Neurosci* 24(12):3115-  
686 3124.
- 687 40. Raizen DM, *et al.* (2008) Lethargus is a *Caenorhabditis elegans* sleep-like state.  
688 *Nature* 451(7178):569-572.
- 689 41. Hardaker LA, Singer E, Kerr R, Zhou G, & Schafer WR (2001) Serotonin modulates  
690 locomotory behavior and coordinates egg-laying and movement in *Caenorhabditis*  
691 *elegans*. *J Neurobiol* 49(4):303-313.
- 692 42. Segalat L, Elkes DA, & Kaplan JM (1995) Modulation of serotonin-controlled  
693 behaviors by Go in *Caenorhabditis elegans*. *Science* 267(5204):1648-1651.
- 694 43. Moresco JJ & Koelle MR (2004) Activation of EGL-47, a Galpha(o)-coupled  
695 receptor, inhibits function of hermaphrodite-specific motor neurons to regulate  
696 *Caenorhabditis elegans* egg-laying behavior. *J Neurosci* 24(39):8522-8530.
- 697 44. Reiner DJ & Thomas JH (1995) Reversal of a muscle response to GABA during  
698 *C. elegans* male development. *J Neurosci* 15(9):6094-6102.



- 699 45. Pokala N, Liu Q, Gordus A, & Bargmann CI (2014) Inducible and titratable silencing  
700 of *Caenorhabditis elegans* neurons in vivo with histamine-gated chloride channels.  
701 *Proc Natl Acad Sci U S A* 111(7):2770-2775.
- 702 46. Sundaram M & Greenwald I (1993) Suppressors of a lin-12 hypomorph define  
703 genes that interact with both lin-12 and glp-1 in *Caenorhabditis elegans*. *Genetics*  
704 135(3):765-783.
- 705 47. Tanis JE, Moresco JJ, Lindquist RA, & Koelle MR (2008) Regulation of serotonin  
706 biosynthesis by the G proteins Galphao and Galphaq controls serotonin signaling  
707 in *Caenorhabditis elegans*. *Genetics* 178(1):157-169.
- 708 48. Bellemer A, Hirata T, Romero MF, & Koelle MR (2011) Two types of chloride  
709 transporters are required for GABA(A) receptor-mediated inhibition in *C. elegans*.  
710 *EMBO J* 30(9):1852-1863.
- 711 49. Tanis JE, Bellemer A, Moresco JJ, Forbush B, & Koelle MR (2009) The potassium  
712 chloride cotransporter KCC-2 coordinates development of inhibitory  
713 neurotransmission and synapse structure in *Caenorhabditis elegans*. *J Neurosci*  
714 29(32):9943-9954.
- 715 50. Mammoto A, Mammoto T, & Ingber DE (2012) Mechanosensitive mechanisms in  
716 transcriptional regulation. *J Cell Sci* 125(Pt 13):3061-3073.
- 717 51. Shynlova O, *et al.* (2007) Uterine stretch regulates temporal and spatial expression  
718 of fibronectin protein and its alpha 5 integrin receptor in myometrium of unilaterally  
719 pregnant rats. *Biol Reprod* 77(5):880-888.

- 720 52. Terzidou V, *et al.* (2005) Mechanical stretch up-regulates the human oxytocin  
721 receptor in primary human uterine myocytes. *J Clin Endocrinol Metab* 90(1):237-  
722 246.
- 723 53. Chiu CZ, Wang BW, & Shyu KG (2013) Effects of cyclic stretch on the molecular  
724 regulation of myocardin in rat aortic vascular smooth muscle cells. *J Biomed Sci*  
725 20:50.
- 726 54. Hille B (2001) *Ion Channels of Excitable Membranes* (Sinaur) Third Ed.
- 727 55. Topalidou I, *et al.* (2012) Genetically separable functions of the MEC-17 tubulin  
728 acetyltransferase affect microtubule organization. *Curr Biol* 22(12):1057-1065.
- 729 56. Yeh E, *et al.* (2008) A putative cation channel, NCA-1, and a novel protein, UNC-  
730 80, transmit neuronal activity in *C. elegans*. *PLoS Biol* 6(3):e55.
- 731 57. Moody WJ & Bosma MM (2005) Ion channel development, spontaneous activity,  
732 and activity-dependent development in nerve and muscle cells. *Physiol Rev*  
733 85(3):883-941.
- 734 58. Lu W, Bushong EA, Shih TP, Ellisman MH, & Nicoll RA (2013) The cell-  
735 autonomous role of excitatory synaptic transmission in the regulation of neuronal  
736 structure and function. *Neuron* 78(3):433-439.
- 737 59. Sando R, *et al.* (2017) Assembly of Excitatory Synapses in the Absence of  
738 Glutamatergic Neurotransmission. *Neuron* 94(2):312-321 e313.
- 739 60. Verhage M, *et al.* (2000) Synaptic assembly of the brain in the absence of  
740 neurotransmitter secretion. *Science* 287(5454):864-869.

- 741 61. Xiao H, *et al.* (2006) SER-1, a *Caenorhabditis elegans* 5-HT<sub>2</sub>-like receptor, and a  
742 multi-PDZ domain containing protein (MPZ-1) interact in vulval muscle to facilitate  
743 serotonin-stimulated egg-laying. *Dev Biol* 298(2):379-391.
- 744 62. Correa PA, Gruninger T, & Garcia LR (2015) DOP-2 D<sub>2</sub>-Like Receptor Regulates  
745 UNC-7 Innexins to Attenuate Recurrent Sensory Motor Neurons during *C. elegans*  
746 Copulation. *J Neurosci* 35(27):9990-10004.
- 747 63. Grillner S (2003) The motor infrastructure: from ion channels to neuronal networks.  
748 *Nat Rev Neurosci* 4(7):573-586.
- 749 64. Fushiki A, *et al.* (2016) A circuit mechanism for the propagation of waves of muscle  
750 contraction in *Drosophila*. *Elife* 5:13253.
- 751 65. Spencer NJ, Dickson EJ, Hennig GW, & Smith TK (2006) Sensory elements within  
752 the circular muscle are essential for mechanotransduction of ongoing peristaltic  
753 reflex activity in guinea-pig distal colon. *J Physiol* 576(Pt 2):519-531.
- 754 66. Hu Z, Pym EC, Babu K, Vashlishan Murray AB, & Kaplan JM (2011) A  
755 neuropeptide-mediated stretch response links muscle contraction to changes in  
756 neurotransmitter release. *Neuron* 71(1):92-102.
- 757 67. Li W, Feng Z, Sternberg PW, & Xu XZ (2006) A *C. elegans* stretch receptor neuron  
758 revealed by a mechanosensitive TRP channel homologue. *Nature* 440(7084):684-  
759 687.
- 760 68. Wen Q, *et al.* (2012) Proprioceptive coupling within motor neurons drives *C.*  
761 *elegans* forward locomotion. *Neuron* 76(4):750-761.

762 69. Katz PS & Harris-Warrick RM (1990) Neuromodulation of the crab pyloric central  
763 pattern generator by serotonergic/cholinergic proprioceptive afferents. *J Neurosci*  
764 10(5):1495-1512.

765 70. Brenner S (1974) The genetics of *Caenorhabditis elegans*. *Genetics* 77(1):71-94.

766 71. Chase DL, Pepper JS, & Koelle MR (2004) Mechanism of extrasynaptic dopamine  
767 signaling in *Caenorhabditis elegans*. *Nat Neurosci* 7(10):1096-1103.

768

769

770

771

772

773

774

775

776

777

778

779

780 **Figure Legends**

781  
782  
783  
784  
785  
786  
787  
788  
789  
790  
791  
792  
793  
794

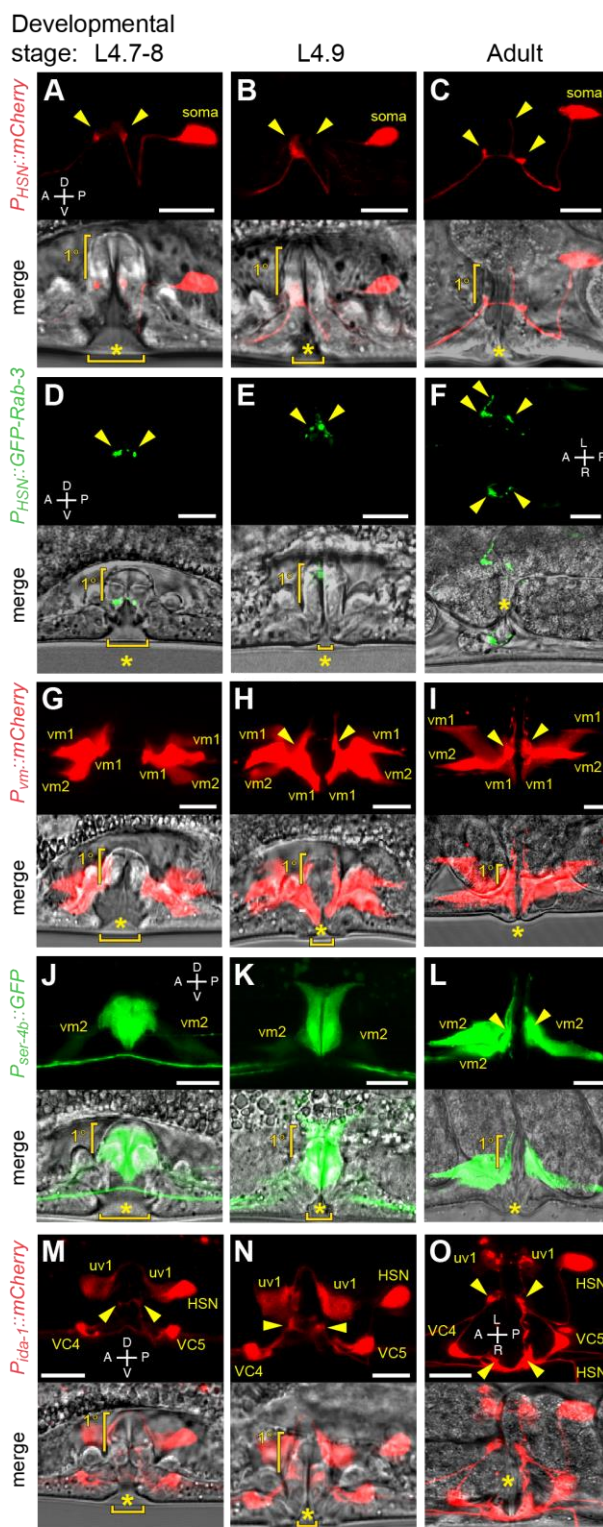

795 **Fig. 1: Morphological development of the *C. elegans* egg-laying circuit. (A-C)**  
796 Morphology of HSN (top) and vulva (bottom) in L4.7-8 (A) and L4.9 (B) larval stages

797 and in adults (C). (D-F) Morphology of HSN synapses (top) and vulva (bottom) in L4.7-8  
798 (C) and L4.9 (D) larval stages and in adults (E). Arrowheads indicate RAB-3-GFP  
799 presynaptic puncta. (G-I) Morphology of vm1 and vm2 vulval muscles (top) and vulva  
800 (bottom) in L4.7-8 (G) and L4.9 (H) larval stages and in adults (I). (J-L) Developmental  
801 expression of *ser-4* from a GFP transcriptional reporter at the L4.7-8 (J) and L4.9 (K)  
802 larval stages and in adults (L). (M-O) Morphology of HSN, VC4, VC5, and the uv1  
803 neuroendocrine cells (top) and vulva (bottom) in L4.7-8 (M) and L4.9 (N) larval stages  
804 and in adults (O) visualized using the *ida-1* promoter. Arrowheads in all images indicate  
805 the location of presynaptic boutons or postsynaptic vm2 muscle arms. Scale bar is 10  
806  $\mu\text{m}$ , and asterisk indicates the position of the developing or completed vulval opening.  
807 Vertical half-brackets indicate the approximate position of primary ( $1^\circ$ ) vulval epithelial  
808 cells, and horizontal bracket indicates progress of vulval lumen collapse at each larval  
809 stage.

810

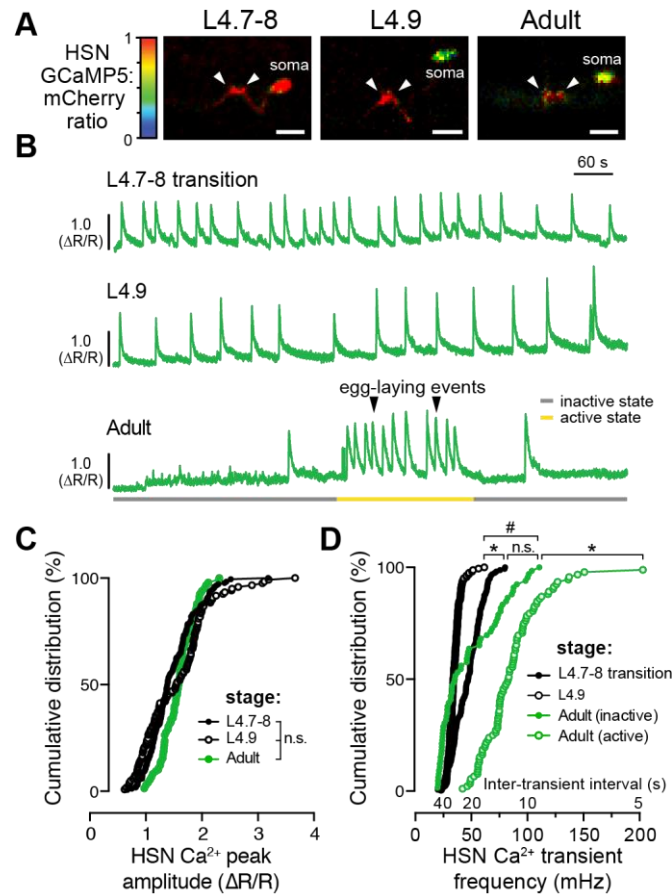

811

812 **Fig. 2. HSN neurons show tonic Ca<sup>2+</sup> activity during the late L4 stage and burst**  
813 **firing during the egg-laying active state. (A)** Micrographs of the intensity-modulated  
814 GCaMP5:mCherry fluorescence ratio during HSN Ca<sup>2+</sup> transients in L4.7-8 and L4.9  
815 larval stages, and in adults. White arrowheads show Ca<sup>2+</sup> activity localized to the anterior  
816 and posterior presynaptic boutons. Scale bar is 10µm; anterior is at left, ventral is at  
817 bottom. See also Movies S1 and S2. (B) Representative GCaMP5:mCherry ratio traces  
818 (ΔR/R) of HSN Ca<sup>2+</sup> activity in L4.7-8 (top), L4.9 (middle), and in adult animals (bottom).  
819 Adults show distinct active (yellow) and inactive (grey) egg-laying behavior states. Black  
820 arrowheads indicate egg-laying events. (C) Cumulative distributions of HSN Ca<sup>2+</sup> peak  
821 amplitudes in L4.7-8 (closed black circles), L4.9 (open black circles), and adults (closed

822 green circles). n.s. indicates  $p > 0.0809$  (one-way ANOVA). (D) Cumulative distribution  
823 plots of instantaneous HSN  $\text{Ca}^{2+}$  transient frequencies (and inter-transient intervals) from  
824 L4.7-8 (closed black circles) and L4.9 (open black circles) animals, and from adult egg-  
825 laying inactive (green closed circles) and active (green open circles) states. Asterisks (\*)  
826 indicate  $p < 0.0001$ ; pound sign (#) indicates  $p = 0.0283$ ; n.s. indicates  $p = 0.1831$  (Kruskal-  
827 Wallis test).

828



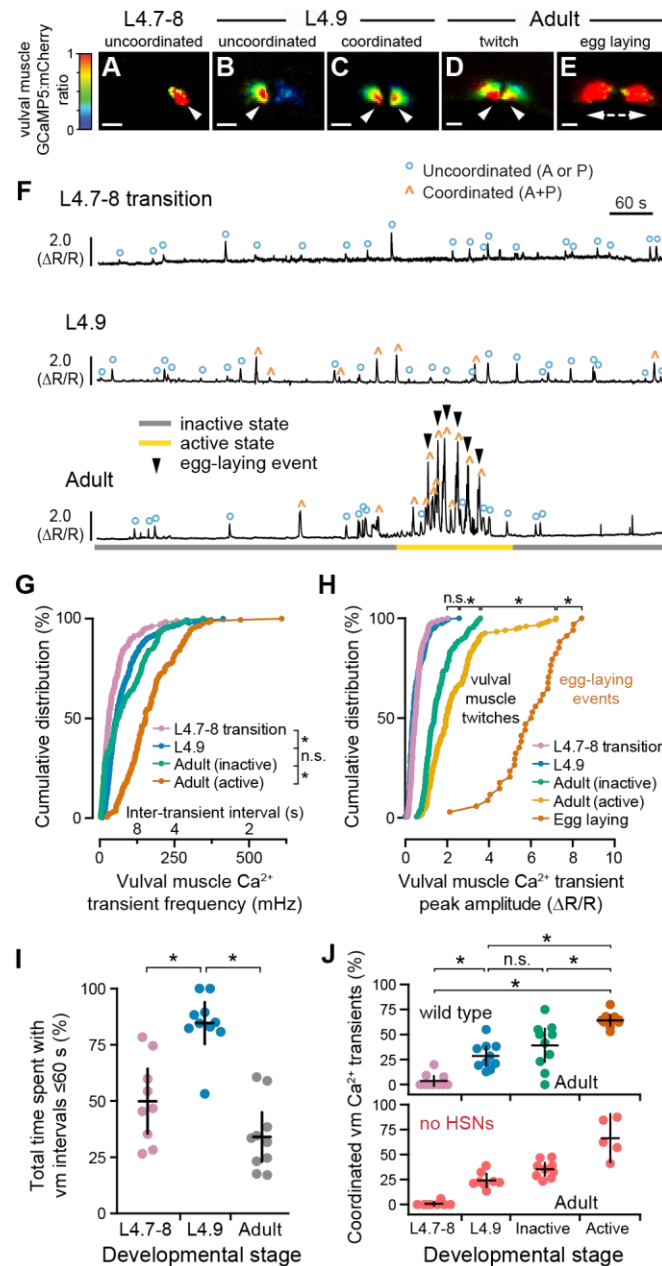

829

830 **Fig. 3. Development of coordinated vulval muscle  $Ca^{2+}$  transients in the L4.9 stage**  
 831 **does not require presynaptic HSN input.** (A-E) Micrographs of GCaMP5:mCherry  
 832 fluorescence ratio during vulval muscle  $Ca^{2+}$  transients at the L4.7-8 (A), L4.9 larval  
 833 stages (B,C), and during the adult active state (D,E). White arrowheads show localization  
 834 of  $Ca^{2+}$  transients. Scale bars are 10  $\mu$ m; anterior at left, ventral at bottom. See also

835 Movies S3-6. (F) GCaMP5:mCherry ( $\Delta R/R$ ) ratio traces of vulval muscle  $Ca^{2+}$  activity at  
836 L4.7-8 (top), L4.9 (middle), and in adults (bottom) during distinct inactive (grey) and active  
837 (yellow) egg-laying states. Uncoordinated transients are indicated by blue circles ( $^{\circ}$ ),  
838 coordinated transients by orange carets ( $\wedge$ ), egg-laying events by black arrowheads. (G  
839 and H) Cumulative distribution plots of instantaneous vulval muscle  $Ca^{2+}$  transient peak  
840 frequencies (G) and amplitudes (H) at L4.7-8 (pink), L4.9 (blue), and in the egg-laying  
841 inactive (green) and active state (orange) of adults. Asterisks indicate  $p < 0.0001$ ; n.s.  
842 indicates  $p > 0.9999$  (Kruskal-Wallis test). (I) Scatterplots show time spent by 9-10 animals  
843 with frequent  $Ca^{2+}$  transients (inter-transient intervals  $\leq 60$  s) at L4.7-8 (pink), L4.9 (blue),  
844 and in adults (gray). Error bars show 95% confidence interval for the mean. Asterisks  
845 indicates  $p \leq 0.0002$  (one-way ANOVA). (J) Scatterplots show percent synchronous  
846 anterior and posterior vulval muscle  $Ca^{2+}$  transients in each individual at L4.7-8 (pink),  
847 L4.9 (blue), and in adult egg-laying inactive (green) and active states (orange) in wildtype  
848 (top) and *egl-1(n986dm)* animals (red) lacking HSNs (bottom). Error bars show 95%  
849 confidence intervals for the mean from  $\geq 5$  animals. Asterisks indicate  $p \leq 0.0022$ ; n.s.  
850 indicates  $p \geq 0.1653$  (one-way ANOVA).

851

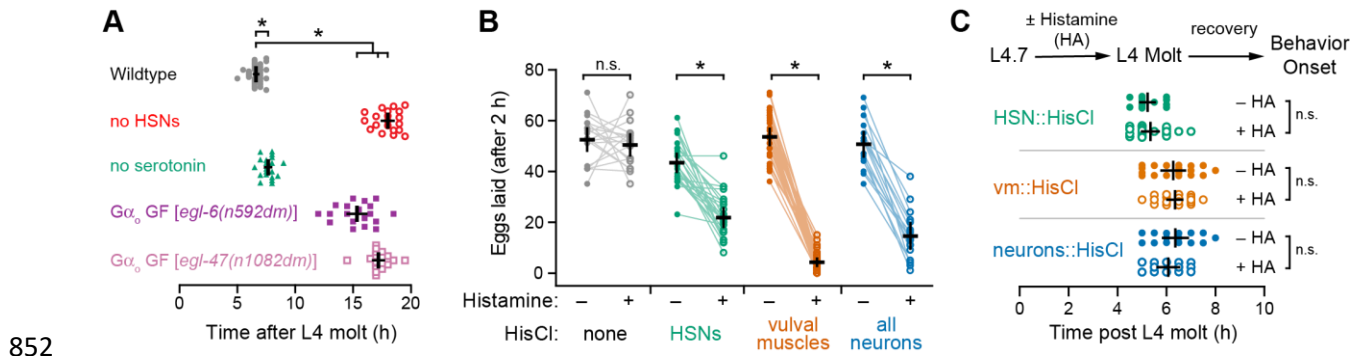

852

853 **Fig. 4. Early HSN and vulval muscle activity is not required for the onset of egg-**

854 **laying behavior.** (A) Scatter plots of the first egg-laying event in wild-type (grey), HSN-

855 deficient *egl-1(n986dm)* (red open circles), serotonin-deficient *tph-1(mg280)* (green

856 triangles), *egl-6(n592dm)* (purple squares), and *egl-47(n1082dm)* (pink open squares)

857 mutant animals. Error bars show 95% confidence intervals for the mean from  $\geq 19$  animals.

858 Asterisks indicate  $p \leq 0.0016$  (One-way ANOVA). (B) Scatter plots showing eggs laid by

859 three 24-hour adult animals in two hours before (closed circles) and after incubation with

860 10 mM histamine (open circles). Transgenic animals expressing HisCl in vulval muscles

861 (orange), HSN neurons (green), and all neurons (blue) were compared with the non-

862 transgenic wild-type (grey). Error bars indicate 95% confidence intervals for the mean

863 from  $\geq 17$  paired replicates. Asterisks indicate  $p < 0.0001$ ; n.s. indicate  $p = 0.5224$  (paired

864 Student's t test). (C) Top, transgenic L4.7 animals were incubated on NGM plates with or

865 without 10 mM histamine until the L4-Adult molt. Animals were then moved to plates

866 lacking histamine and allowed to recover and lay eggs. Bottom, scatter plots show the

867 timing of the first egg-laying event with (open circles) and without (closed circles)

868 histamine. Error bars indicate 95% confidence intervals for the mean; n.s. indicates

869  $p > 0.9999$  (one-way ANOVA).

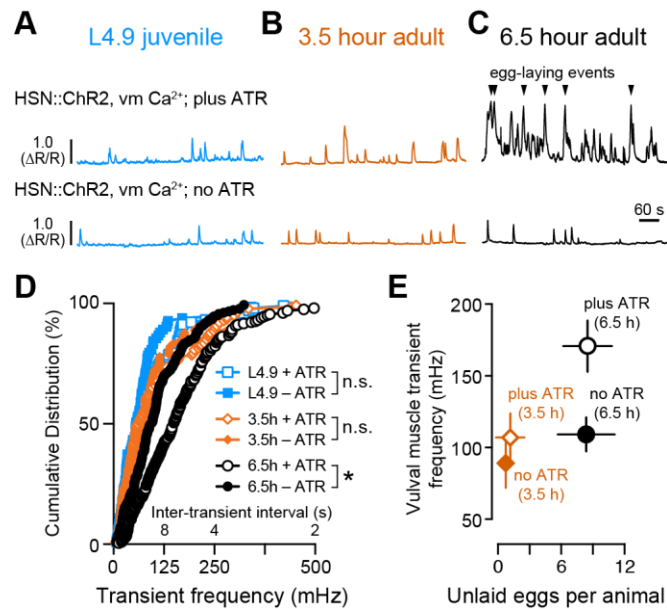

870

871 **Fig. 5. Unlaidd eggs promote vulval muscle responsiveness to HSN activity. (A-C)**

872 Traces of vulval muscle Ca<sup>2+</sup> activity at the L4 stage (A, blue), 3.5-hour adults (B, orange),

873 and 6.5-hour adults (C, black) after optogenetic activation of HSN. Animals were grown

874 in the presence (plus ATR, top) or absence (no ATR, bottom) of all-*trans* retinal. 489 nm

875 laser light was used to simultaneously stimulate HSN ChR2 activity and excite GCaMP5

876 fluorescence for the entire recording. Arrowheads indicate egg laying events. (D)

877 Cumulative distribution plots of instantaneous peak frequencies (and inter-transient

878 intervals) of vulval muscle Ca<sup>2+</sup> activity in L4.9 juveniles (blue filled squares, no ATR; blue

879 open squares, plus ATR), 3.5-hour old adults (orange filled circles, no ATR; orange open

880 circles, plus ATR), and 6.5-hour old adults (black filled circles, no ATR; black open circles,

881 plus ATR). Asterisk indicates  $p < 0.0001$ ; n.s. indicates  $p \geq 0.3836$  (Kruskal-Wallis test). (E)

882 Plot shows the average number of unlaidd eggs present in the uterus and the average

883 vulval muscle Ca<sup>2+</sup> transient peak frequency in 3.5-hour old adults (orange closed

884 diamond, no ATR; orange open diamond, plus ATR), and 6.5-hour old adults (black

885 closed diamond, no ATR; black open diamond plus ATR). Error bars indicate 95%  
886 confidence intervals for the means.

887

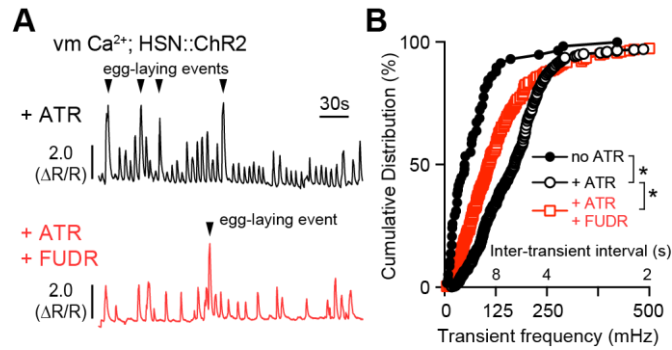

888

889 **Fig. 6. Sterilization decreases vulval muscle responsiveness to HSN activity. (A)**

890 Traces of HSN-induced vulval muscle  $Ca^{2+}$  activity in untreated (top, black) and FUDR-

891 treated 24-hour adult animals (bottom, red). Arrowheads indicate egg laying events. (B)

892 Cumulative distribution plots of instantaneous peak frequencies (and inter-transient

893 intervals) of vulval muscle  $Ca^{2+}$  activity after optogenetic activation of HSNs in untreated

894 animals grown with ATR (+ATR, open black circles), FUDR-treated animals with ATR

895 (+ATR, open red circles), and in untreated animals without ATR (no ATR, closed black

896 circles). Asterisks indicate  $p < 0.0001$  (Kruskal-Wallis test).

897

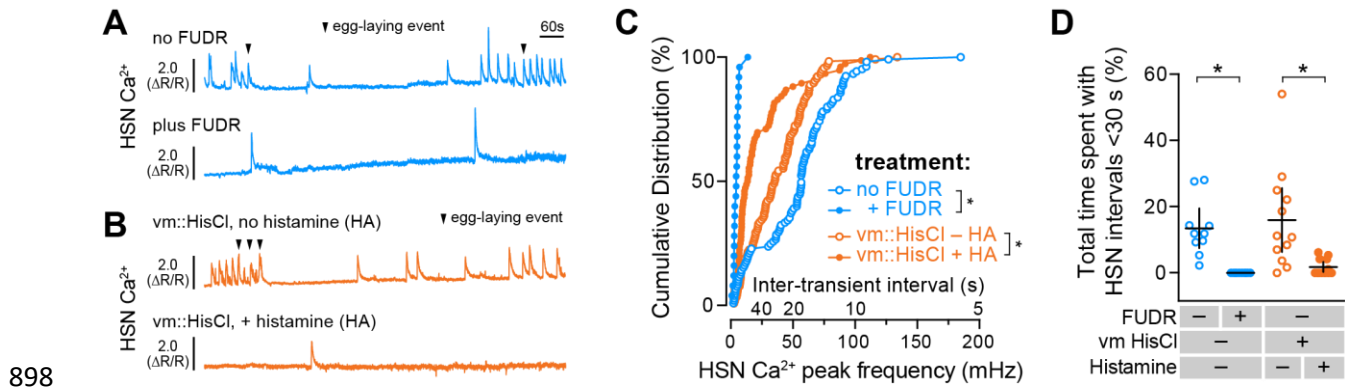

899 **Fig. 7. Egg accumulation and vulval muscle activity promote presynaptic HSN**  
 900 **activity.** (A) HSN  $\text{Ca}^{2+}$  traces in untreated (top) and FUDR-treated (bottom) adult animals.  
 901 (B) HSN  $\text{Ca}^{2+}$  traces in adult animals expressing HisCl in the vulval muscles (vm) without  
 902 (top) and after 10 mM histamine treatment (bottom). Arrowheads indicate egg-laying  
 903 events. (C) Cumulative distribution plots of instantaneous HSN  $\text{Ca}^{2+}$  transient peak  
 904 frequencies (and inter-transient intervals) of adult HSN  $\text{Ca}^{2+}$  activity. (D) Scatterplots  
 905 show total time spent by each individual with HSN transients  $\leq 30$ s apart in FUDR (blue  
 906 open circles), FUDR-treated (blue closed circles), no histamine (orange open circles), and  
 907 histamine-silenced vulval muscles (orange closed circles). Asterisks indicate  $p \leq 0.0031$   
 908 (Kruskal-Wallis test). Error bars indicate 95% confidence intervals for the mean.

909

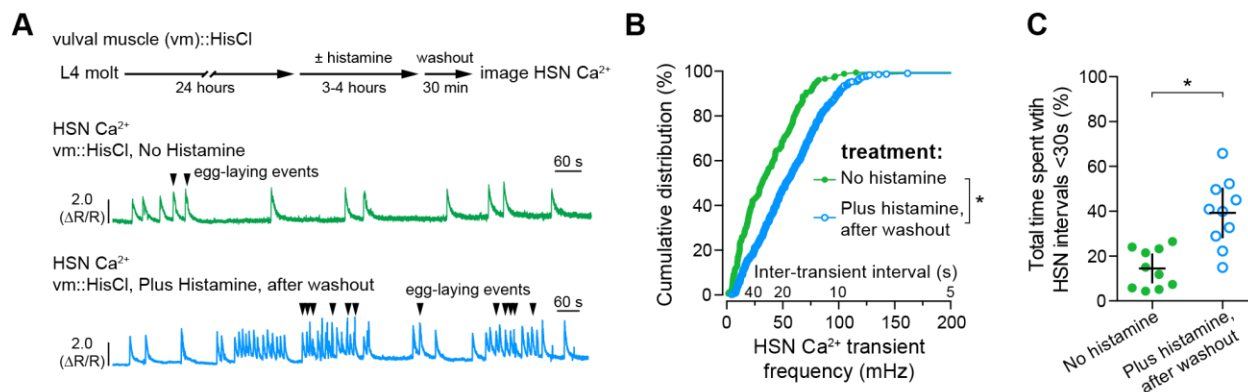

910

911 **Fig. 8. Egg accumulation drives a homeostatic increase in HSN activity and egg**

912 **release.** (A) 24-hour old adult animals expressing HisCl in the vulval muscles (vm) and

913 GCaMP5/mCherry in the HSNs were placed onto NGM plates with (blue, bottom) or

914 without histamine (green, top) for 3-4 hours to induce silencing and cessation of egg

915 laying. Animals were then moved to plates without histamine and allowed to recover for

916 30 minutes before HSN Ca<sup>2+</sup> imaging. Arrowheads indicate egg laying events. (B)

917 Cumulative distribution plots of instantaneous HSN Ca<sup>2+</sup> transient peak frequencies (and

918 inter-transient intervals) after histamine washout (blue open circles) compared with

919 untreated controls (green closed circles). Asterisks indicate p < 0.0001 (Mann-Whitney

920 test). (C) Scatter plots show fraction of time spent by each individual with frequent HSN

921 Ca<sup>2+</sup> transients characteristic of the egg-laying active state (<30 s) in untreated controls

922 (green circles) and after histamine washout (blue open circles). Error bars indicate 95%

923 confidence intervals for the mean. Asterisk indicates p = 0.0005 (Student's t test).

924



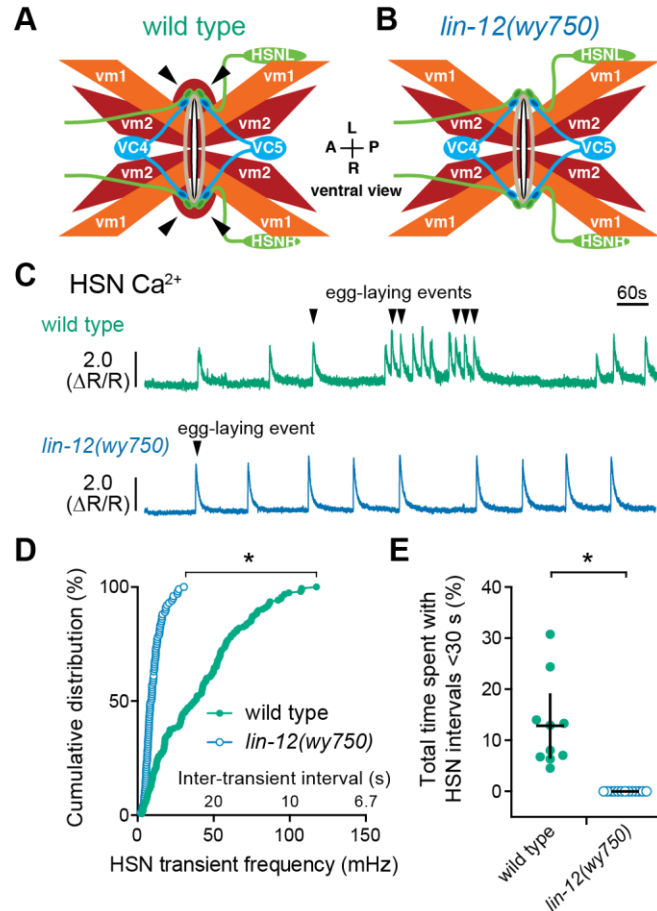

925

926 **Fig. 9: The vm2 muscle arms are required for vulval muscle feedback to HSN and**  
927 **burst firing.** (A-B) Cartoon of egg-laying circuit structure (lateral view) in wild-type (A)  
928 and *lin-12(wy750)* mutant (B) animals missing lateral vm2 muscle arms (arrowheads). (C)  
929 Traces show HSN Ca<sup>2+</sup> activity in wild-type (green) and *lin-12(wy750)* mutant animals  
930 (blue). Arrowheads indicate egg-laying events. (D) Cumulative distribution plots of  
931 instantaneous Ca<sup>2+</sup> transient peak frequencies (and inter-transient intervals) in wild-type  
932 (green circles) and *lin-12(wy750)* mutants (blue circles). Asterisks indicate *p* < 0.0001  
933 (Mann Whitney test). (E) Scatter plots show fraction of time spent by each individual with  
934 frequent HSN Ca<sup>2+</sup> transients characteristic of the egg-laying active state (<30 s) in wild-  
935 type (green circles) and *lin-12(wy750)* mutant animals (blue open circles). Error bars

936 indicate 95% confidence intervals for the mean. Asterisk indicates  $p=0.0011$  (Student's t  
937 test).

938

## 939 **SI Materials and Methods**

940 **Plasmid and strain construction.** A complete list of strains and their use in specific data  
941 Figures can be found in Table S1.

942 **Vulval Muscle  $Ca^{2+}$ :** To visualize vulval muscle  $Ca^{2+}$  activity in adult animals, we used  
943 LX1918 *vsIs164* [*unc-103e::GCaMP5::unc-54 3'UTR* + *unc-103e::mCherry::unc-54*  
944 *3'UTR* + *lin-15(+)*] *lite-1(ce314) lin-15(n765ts) X* strain as described (1). In this strain,  
945 GCaMP5G (2) and mCherry are expressed from the *unc-103e* promoter (3). The *unc-*  
946 *103e* promoter is only weakly expressed in vulval muscles during the L4 stages. To  
947 visualize vulval muscle activity in L4 animals, we expressed GCaMP5G and mCherry  
948 from the *ceh-24* promoter (4). A ~2.8 kB DNA fragment upstream of the *ceh-24* start site  
949 was amplified from genomic DNA by PCR using the following oligonucleotides: 5'-GCG  
950 GCA TGC AAC GAG CCA TCC TAT ATC GGT GGT CCT CCG-3' and 5'-CAT CCC GGG  
951 TTC CAA GGC AGA GAG CTG CTG-3'. This DNA fragment was ligated into pKMC257  
952 (mCherry) and pKMC274 (GCaMP5G) from which the *unc-103e* promoter sequences  
953 were excised to generate pBR3 and pBR4, respectively. pBR3 (20 ng/ $\mu$ l) and pBR4  
954 (80ng/ $\mu$ l) were injected into LX1832 *lite-1(ce314) lin-15(n765ts) X* along with the pLI5EK  
955 rescue plasmid (50 ng/ $\mu$ l) (5). The extrachromosomal transgene produced was integrated  
956 using UV/TMP creating two independent transgenes *keyIs12* and *keyIs13*, which were  
957 then backcrossed to LX1832 parental line six times to generate the strains MIA51 and  
958 MIA53. Strain MIA51 *keyIs12* [*ceh-24::GCaMP5::unc-54 3'UTR* + *ceh-24::mCherry::unc-*  
959 *54 3'UTR* + *lin-15(+)*] IV; *lite-1(ce314) lin-15 (n765ts) X* was subsequently used for  $Ca^{2+}$   
960 imaging. We noted repulsion between *keyIs12* and *wzIs30* IV, a transgene that expresses  
961 Channelrhodopsin-2::YFP in HSN from the *egl-6* promoter (6), suggesting both were

962 linked to chromosome IV. As a result, we crossed MIA53 *keyIs13[ceh-24::GCaMP5::unc-*  
963 *54 3'UTR + ceh-24::mCherry::unc-54 3'UTR + lin-15(+)]*; *lite-1(ce314) lin-15(n765ts) X*  
964 with LX1836 *wzIs30 IV; lite-1(ce314) lin-15(n765ts) X*, generating MIA88 which was used  
965 to activate HSN neurons and record vulval muscle Ca<sup>2+</sup> in L4 animals. In the case of  
966 young adults (3 & 6h post molt) and 24h old adults, strain LX1932 *wzIs30 IV; vsIs164 lite-*  
967 *1(ce314) lin-15(n765ts) X* was used as described (1).

968 **HSN Ca<sup>2+</sup>**: To visualize HSN Ca<sup>2+</sup> activity in L4 and adult animals, we used the LX2004  
969 *vsIs183 [nlp-3::GCaMP5::nlp-3 3'UTR + nlp-3::mCherry::nlp-3 3'UTR + lin-15(+)] lite-*  
970 *1(ce314) lin-15(n765ts) X* strain expressing GCaMP5 and mCherry from the *nlp-3*  
971 promoter as previously described (1). In order to visualize HSN Ca<sup>2+</sup> activity in *lin-*  
972 *12(wy750)* mutant animals lacking post-synaptic vm2 vulval muscle arms, we crossed the  
973 MIA194 *lin-12(wy750) III* with LX2004 *vsIs183 lite-1(ce314) lin-15(n765ts) X* to generate  
974 MIA196 *lin-12(wy750) III; vsIs183 X lite-1(ce314) lin-15 (n765ts) X*.

975 **Vulval muscle HisCl**: To produce a vulval muscle-specific HisCl transgene, coding  
976 sequences for mCherry in pBR3 were replaced with that for HisCl. First, an EagI  
977 restriction site (3' of the mCherry encoding sequence) was changed to a NotI site using  
978 Quickchange mutagenesis to generate pBR5. The ~1.2 kB DNA fragment encoding the  
979 HisCl channel was amplified from pNP403 (7) using the following oligonucleotides: 5'-  
980 GCG GCT AGC GTA GAA AAA ATG CAA AGC CCA ACT AGC AAA TTG G-3' and 5'-  
981 GTG GCG GCC GCT TAT CAT AGG AAC GTT GTC-3', cut with NheI/NotI, and ligated  
982 into pBR5 to generate pBR7. pBR7 (80ng/μl) was injected into LX1832 along with pLI5EK  
983 (50ng/μl). One line bearing an extrachromosomal transgene was integrated with UV/TMP,  
984 and six independent integrants (*keyIs14* to *keyIs19*) were recovered. Four of these were

985 then backcrossed to the LX1832 parental line six times to generate strains MIA68, MIA69,  
986 MIA70, and MIA71. All four strains were used for behavioral assays in adult animals to  
987 test the effect of vulval muscle silencing on egg laying (Fig. 4B). MIA71 *keyIs19* [*ceh-*  
988 *24::HisCl::unc-54 3'UTR + lin-15(+)*]; *lite-1(ce314) lin-15(n765ts)* X strain was used to  
989 study the effect of acute silencing of early activity on egg-laying behavior (Fig. 4C). To  
990 visualize HSN Ca<sup>2+</sup> activity after vulval muscle silencing, we crossed MIA71 with LX2004  
991 to generate strain MIA80 *keyIs19; vsIs183 lite-1(ce314) lin-15(n765ts)* X.

992 **HSN HisCl:** The ~1.2 kB DNA fragment encoding the HisCl channel was amplified from  
993 pNP403 using the following oligonucleotides: 5'- GCG GCT AGC GTA GAA AAA ATG  
994 CAA AGC CCA ACT AGC AAA TTG G-3' and 5'-GCG GAG CTC TTA TCA TAG GAA  
995 CGT TGT CCA ATA GAC AAT A-3'. The amplicon was digested with NheI/SacI and  
996 ligated into similarly cut pSF169 (*pegl-6::mCre* (8)) to generate pBR10. To follow  
997 expression in HSN, mCherry was amplified using the following oligonucleotides: 5'- GCG  
998 GCT AGC GTA GAA AAA ATG GTC TCA AAG GGT-3' and 5'- GCG GAG CTC TCA  
999 GAT TTA CTT ATA CAA TTC ATC CAT G-3'. This amplicon was digested with NheI/SacI  
1000 and ligated into pSF169 to generate pBR12. pBR10 (HisCl; 5ng/μl) and pBR12 (mCherry;  
1001 10ng/μl) were injected into LX1832 *lite-1(ce314) lin-15(n765ts)* along with pLI5EK  
1002 (50ng/μl). The extrachromosomal transgene produced was integrated with UV/TMP,  
1003 creating three independent integrants (*keyIs20* to *keyIs22*). The resulting animals were  
1004 backcrossed to the LX1832 parental line six times to generate strains MIA115, MIA116,  
1005 and MIA117. The MIA116 strain had a low incidence of HSN developmental defects and  
1006 was used subsequently for behavioral assays.

1007 **All neuron HisCl:** pNP403 was injected into LX1832 *lite-1(ce314) lin-15(n765ts)* animals  
1008 at 50ng/μl along with pLI5EK (50ng/μl) to produce strain MIA60 carrying  
1009 extrachromosomal transgene *keyEx16 [tag-168::HisCl::SL2::GFP + lin15(+)]*. Non-Muv,  
1010 *lin-15(+)* animals with strong GFP expression in the HSNs and other neurons were  
1011 selected prior to behavioral silencing assays. All selected animals showed histamine-  
1012 dependent paralysis that recovered after washout.

1013 **Vulval muscle morphology:** To visualize vulval muscle development at the L4 stages,  
1014 we injected pBR3 (80ng/μl) [*pceh-24::mCherry*] along with a co-injection marker pCFJ90  
1015 (10ng/μl) into TV201 *wyls22 [punc-86::GFP::RAB-3 + podr-2::dsRed]* (9) to generate an  
1016 extrachromosomal transgene, *keyEx42*. To visualize adult vulval muscle morphology, we  
1017 used the LX1918 *vsIs164 [unc-103e::GCaMP5::unc-54 3'UTR + unc-*  
1018 *103e::mCherry::unc-54 3'UTR + lin-15(+)] lite-1(ce314) lin-15(n765ts) X* strain (1). To  
1019 visualize the expression of the *ser-4* gene, we used the strain AQ570 [*ijIs570*] (10, 11).

1020 **HSN morphology:** We used the LX2004 strain expressing mCherry from the *nlp-3*  
1021 promoter to visualize HSN morphology at L4 stages as well as in adults. To visualize HSN  
1022 presynaptic development at L4 stages, the *wyls22* transgene was used.

1023 **Whole circuit morphology (HSN, VC and uv1 cells):** A ~3.2 kB DNA fragment  
1024 upstream of the *ida-1* start site (12) was cloned using the following oligonucleotides: 5'-  
1025 GCG GCA TGC CCT GCC TGT GCC AAC TTA CCT-3' and 5'-CAT CCC GGG GCG  
1026 GAT GAC ACA GAG ATG CGG-3'. The DNA fragment was digested with SphI/XmaI and  
1027 ligated into pKMC257 and pKMC274 to generate plasmids pBR1 and pBR2. pBR1 (20  
1028 ng/μl) and pBR2 (80ng/μl) were co-injected into LX1832 along with pLI5EK (50 ng/μl).  
1029 The extrachromosomal transgene produced was integrated with UV/TMP creating four

1030 independent integrants *keyIs8* to *keyIs11*, which were then backcrossed to LX1832  
1031 parental line six times. MIA49 *keyIs11* [*ida-1::GCaMP5::unc-54 3'UTR* + *ida-*  
1032 *1::mCherry::unc-54 3'UTR* + *lin-15(+)*]; *lite-1(ce314)* *lin-15 (n765ts)* X was used  
1033 subsequently to visualize whole-circuit morphology.

1034

### 1035 **Optogenetics and Defecation Behavior Assays.**

1036 Intervals between Expulsion steps of the defecation motor program were determined as  
1037 described from brightfield and HSN Ca<sup>2+</sup> recordings (13). To test whether optogenetic  
1038 activation of the HSNs affected defecation behavior on plates, a OTPG\_4 TTL Pulse  
1039 Generator (Doric Optics) was used to trigger image capture (Grasshopper 3, 4.1  
1040 Megapixel, USB3 CMOS camera, Point Grey Research) and shutter opening on a  
1041 EL6000 metal halide light source generating 8-16 mW/cm<sup>2</sup> of ~470±20nm blue light via a  
1042 EGFP filter set mounted on a Leica M165FC stereomicroscope. Late L4 and adult LX1836  
1043 transgenic animals were maintained on OP50 seeded with or without all-*trans* retinal  
1044 (ATR) (0.4 mM). Animals were illuminated with blue light for a duration of 2 minutes, and  
1045 video recordings of defecation events which occurred within the duration of blue light  
1046 activation were obtained.

1047

1048

1049 **Supplemental references**

- 1050 1. Collins KM, *et al.* (2016) Activity of the *C. elegans* egg-laying behavior circuit is  
1051 controlled by competing activation and feedback inhibition. *Elife* 5:e21126.
- 1052 2. Akerboom J, *et al.* (2013) Genetically encoded calcium indicators for multi-color  
1053 neural activity imaging and combination with optogenetics. *Front Mol Neurosci* 6:2.
- 1054 3. Collins KM & Koelle MR (2013) Postsynaptic ERG potassium channels limit  
1055 muscle excitability to allow distinct egg-laying behavior states in *Caenorhabditis*  
1056 *elegans*. *J Neurosci* 33(2):761-775.
- 1057 4. Harfe BD & Fire A (1998) Muscle and nerve-specific regulation of a novel NK-2  
1058 class homeodomain factor in *Caenorhabditis elegans*. *Development* 125(3):421-  
1059 429.
- 1060 5. Clark SG, Lu X, & Horvitz HR (1994) The *Caenorhabditis elegans* locus *lin-15*, a  
1061 negative regulator of a tyrosine kinase signaling pathway, encodes two different  
1062 proteins. *Genetics* 137(4):987-997.
- 1063 6. Emtage L, *et al.* (2012) IRK-1 potassium channels mediate peptidergic inhibition  
1064 of *Caenorhabditis elegans* serotonin neurons via a G(o) signaling pathway. *J*  
1065 *Neurosci* 32(46):16285-16295.
- 1066 7. Pokala N, Liu Q, Gordus A, & Bargmann CI (2014) Inducible and titratable silencing  
1067 of *Caenorhabditis elegans* neurons in vivo with histamine-gated chloride channels.  
1068 *Proc Natl Acad Sci U S A* 111(7):2770-2775.
- 1069 8. Flavell SW, *et al.* (2013) Serotonin and the neuropeptide PDF initiate and extend  
1070 opposing behavioral states in *C. elegans*. *Cell* 154(5):1023-1035.
- 1071 9. Patel MR, *et al.* (2006) Hierarchical assembly of presynaptic components in  
1072 defined *C. elegans* synapses. *Nat Neurosci* 9(12):1488-1498.
- 1073 10. Gurel G, Gustafson MA, Pepper JS, Horvitz HR, & Koelle MR (2012) Receptors  
1074 and other signaling proteins required for serotonin control of locomotion in  
1075 *Caenorhabditis elegans*. *Genetics* 192(4):1359-1371.
- 1076 11. Tsalik EL & Hobert O (2003) Functional mapping of neurons that control  
1077 locomotory behavior in *Caenorhabditis elegans*. *J Neurobiol* 56(2):178-197.
- 1078 12. Cai T, Fukushige T, Notkins AL, & Krause M (2004) Insulinoma-Associated Protein  
1079 IA-2, a Vesicle Transmembrane Protein, Genetically Interacts with UNC-31/CAPS  
1080 and Affects Neurosecretion in *Caenorhabditis elegans*. *J Neurosci* 24(12):3115-  
1081 3124.
- 1082 13. Thomas JH (1990) Genetic analysis of defecation in *Caenorhabditis elegans*.  
1083 *Genetics* 124(4):855-872.

1084

1085

1086



1087 **Supplementary Figures and Tables**

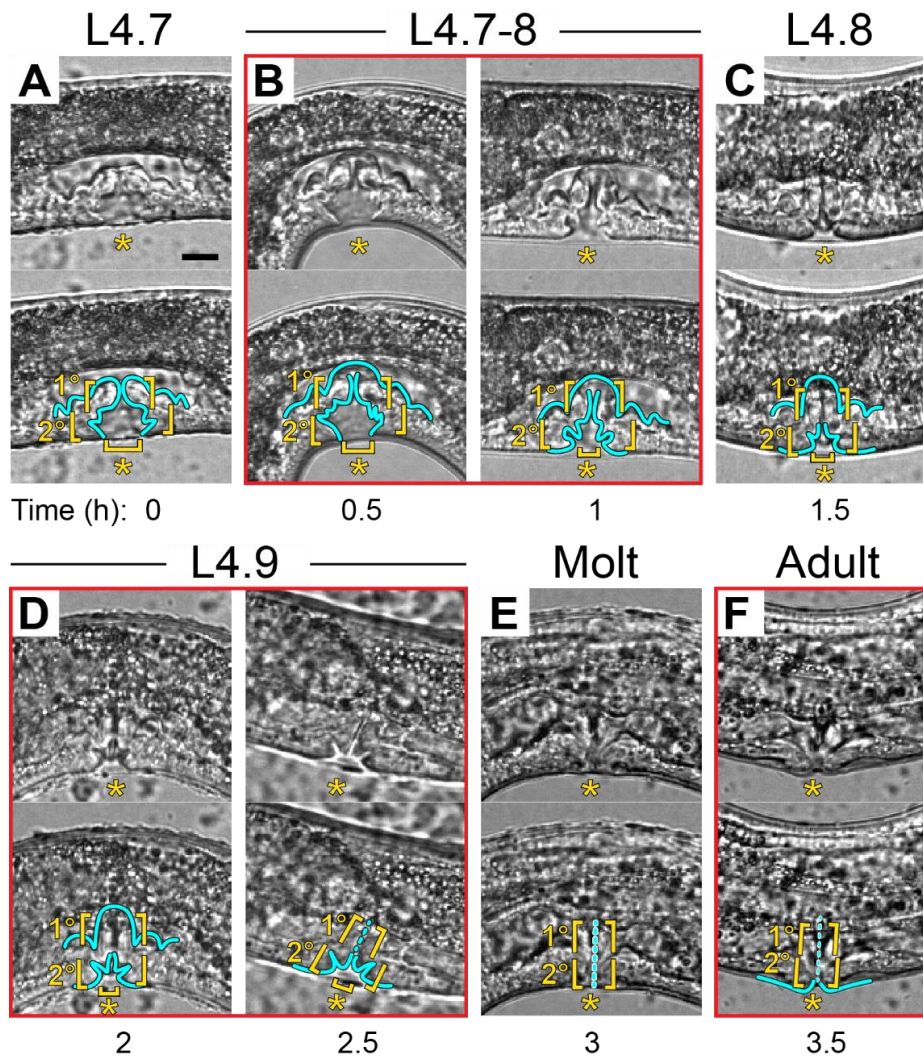

1088

1089 **Fig. S1: Morphological development of the *C. elegans* egg-laying circuit. (A-F)**

1090 Representative images of vulval morphology at late L4 stages- (A) L4.7, (B) L4.7-8, (C)

1091 L4.8, (D) L4.9, (E) Molt and (F) Young adult. Cartoon trace (cyan) in panels shows the

1092 gross morphology of the developing vulva at each stage. Yellow horizontal square

1093 brackets (yellow) near the vulval opening indicate the width of the vulval lumen. Yellow

1094 vertical square brackets encompass the length of primary (1°) vulval epithelial (vulE and

1095 vulF) and secondary (2°) vulval epithelial (vulA-D) cells. Anterior is at left and ventral is at

1096 bottom. Scale bar in all images is 10  $\mu\text{m}$ , and asterisk indicates the position of the  
1097 developing or completed vulval opening.

1098

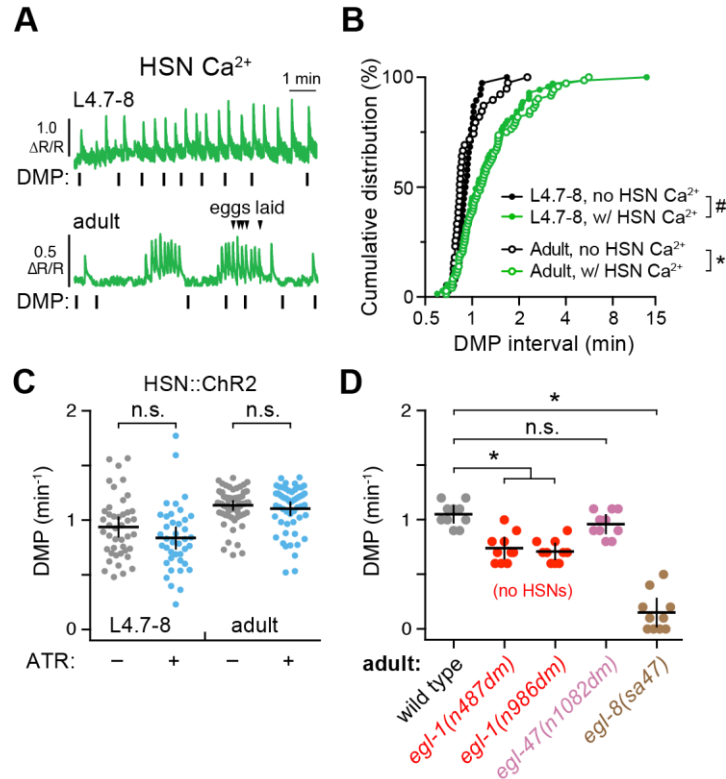

1099

1100 **Fig. S2: HSN regulates the defecation motor program.** (A) Representative HSN  $\text{Ca}^{2+}$   
1101 traces at the L4.7-8 larval stage (top) and adults (bottom). Vertical lines indicate the  
1102 expulsion step of the defecation motor program (DMP); arrowheads indicate adult egg-  
1103 laying events. (B) Cumulative distribution plots showing DMP intervals with no HSN  $\text{Ca}^{2+}$   
1104 transient (black) versus those with one or more HSN  $\text{Ca}^{2+}$  transients (green) in L4.7-8  
1105 (closed circles) and adult (open circles). Pound indicates  $p=0.0058$ ; asterisk indicates  
1106  $p<0.0001$  (Kruskal-Wallis test with Dunn's correction for multiple comparisons). (C)  
1107 Scatter plots showing the consequences of HSN optogenetic activation on the DMP  
1108 frequency. L4.7-8 and adult animals expressing Channelrhodopsin-2 in HSN neurons were  
1109 grown in the absence (-, grey) or presence (+, blue) of all-*trans* retinal (ATR), illuminated  
1110 with blue light for two minutes, and the timing of DMP events was used to calculate an  
1111 instantaneous DMP frequency. Error bars show 95% confidence intervals for the mean;

1112 n.s. indicates  $p=0.0645$  (L4.7-8) or  $p=0.1866$ , (adult) (Student's t test). (D) Scatter plots  
1113 showing DMP frequencies ( $\text{min}^{-1}$ ) in wild-type (grey), *egl-1(n487dm)* and *egl-1(n986dm)*  
1114 (red), *egl-47(n1082dm)* (pink), and *egl-8(sa47)* (brown) adults. Error bars indicate the  
1115 95% confidence interval for the mean. Asterisk indicates  $p<0.0001$ ; n.s. indicates  
1116  $p=0.5208$  (One-way ANOVA with Bonferroni's correction for multiple comparisons).  
1117

1118

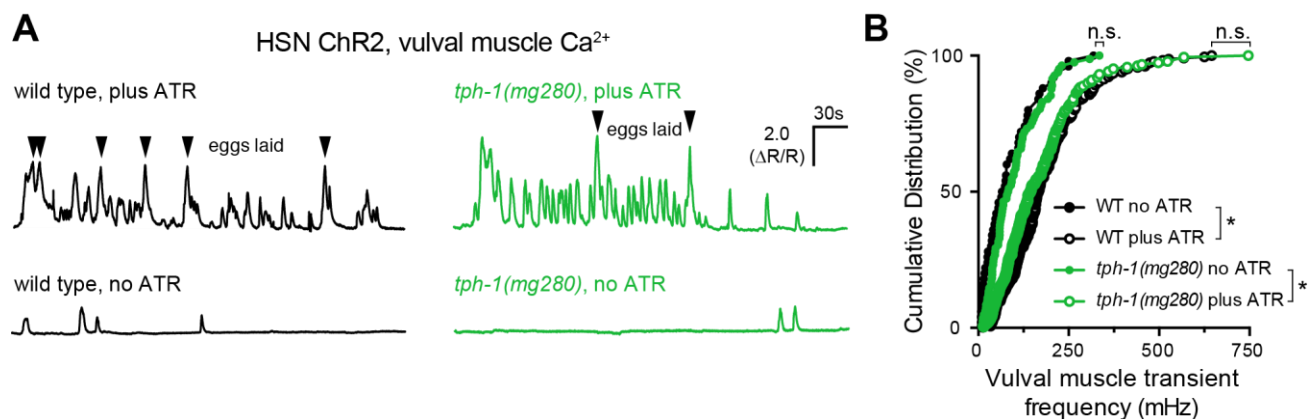

1119

1120 **Fig. S3. HSN activation of the vulval muscles does not require serotonin.** (A) Vulval

1121 muscle  $Ca^{2+}$  recordings from 6-hour adult wild-type and *tph-1(mg280)* mutant animals

1122 expressing Channelrhodopsin-2 (ChR2) in the HSNs grown in the presence (plus ATR,

1123 top) or absence (no ATR, bottom) of all-*trans* retinal. 489 nm laser light was used to

1124 simultaneously stimulate ChR2 activity and excite GCaMP5 fluorescence during the

1125 entire recording. Arrowheads indicate egg-laying events. (B) Cumulative distribution plots

1126 of instantaneous vulval muscle  $Ca^{2+}$  transient peak frequencies of 6-hour adult wild-type

1127 (black filled circles, no ATR; black open circles, plus ATR) and *tph-1(mg280)* mutant

1128 animals (green filled circles, no ATR; green open circles, plus ATR). Asterisks indicate

1129  $p < 0.0001$ ; n.s. indicates  $p \geq 0.2863$  (Kruskal-Wallis test with Dunn's correction for multiple

1130 comparisons).

| Strain  | Feature                                                                                                       | Genotype                                                                  | Figures        |
|---------|---------------------------------------------------------------------------------------------------------------|---------------------------------------------------------------------------|----------------|
| LX1832  | Strain for transgene production                                                                               | <i>lite-1(ce314) lin-15(n765ts) X</i>                                     | -              |
| N2      | Bristol strain                                                                                                | wild type                                                                 | 4, S1, S2      |
| LX2004  | HSN GCaMP5, mCherry                                                                                           | <i>vsIs183 lite-1(ce314) lin-15(n765ts) X</i>                             | 1, 2, 7, 9, S2 |
| TV201   | HSN presynaptic RAB-3-GFP                                                                                     | <i>wyIs22 IV</i>                                                          | 1              |
| MIA189  | mCherry expression under <i>ceh-24</i> promoter                                                               | <i>keyEx40; wyIs22 IV</i>                                                 | 1              |
| LX1918  | vulval muscles GCaMP5, mCherry                                                                                | <i>vsIs164 lite-1(ce314) lin-15(n765ts) X</i>                             | 1, 3           |
| AQ570   | GFP expression under the <i>ser-4</i> promoter                                                                | <i>ijIs570</i>                                                            | 1              |
| MIA49   | HSN, VC and uv1 cells GCaMP5, mCherry                                                                         | <i>keyIs11; lite-1(ce314) lin-15(n765ts) X</i>                            | 1              |
| MIA51   | Vulval muscles GCaMP, mCherry (under <i>ceh-24</i> promoter)                                                  | <i>keyIs12; lite-1(ce314) lin-15(n765ts) X</i>                            | 3              |
| LX1938  | No HSNs, vulval muscles GCaMP5, mCherry                                                                       | <i>egl-1(n986dm) V; vsIs164 lite-1(ce314) lin-15(n765ts) X</i>            | 3              |
| MIA78   | No HSNs, vulval muscles GCaMP5, mCherry                                                                       | <i>egl-1(n986dm) V; keyIs12; lite-1(ce314) lin-15(n765ts) X</i>           | 3              |
| MT2059  | No HSNs                                                                                                       | <i>egl-1(n986dm) V</i>                                                    | 4, S2          |
| MT1222  | Increased $G\alpha_o$ signaling in HSN                                                                        | <i>egl-6(n5920) X</i>                                                     | 4              |
| MT2258  | Increased $G\alpha_o$ signaling in HSN                                                                        | <i>egl-47(n1081) V</i>                                                    | 4, S2          |
| MT15434 | No serotonin                                                                                                  | <i>tph-1(mg280) II</i>                                                    | 4              |
| MIA71   | vulval muscles expressing Histamine-gated $Cl^-$ channels (HisCl)                                             | <i>keyIs19; lite-1(ce314) lin-15(n765ts) X</i>                            | 4              |
| MIA116  | HSN HisCl                                                                                                     | <i>keyIs21; lite-1(ce314) lin-15(n765ts) X</i>                            | 4              |
| MIA60   | All neurons HisCl                                                                                             | <i>keyEx16; lite-1(ce314) lin-15(n765ts) X</i>                            | 4              |
| MIA88   | HSN Channelrhodopsin, vulval muscle GCaMP5, mCherry (under <i>ceh-24</i> promoter)                            | <i>wzIs30 IV; keyIs13; lite-1(ce314) lin-15(n765ts) X</i>                 | 5              |
| LX1932  | HSN Channelrhodopsin, vulval muscle GCaMP5, mCherry (under <i>unc-103e</i> promoter)                          | <i>wzIs30 IV; vsIs164 lite-1(ce314) lin-15(n765ts) X</i>                  | 5, 6, S3       |
| MIA80   | Vulval muscles HisCl, HSN GCaMP5, mCherry                                                                     | <i>keyIs19; vsIs183 lite-1(ce314) lin-15(n765ts) X</i>                    | 7, 8           |
| MIA196  | No vulval muscle arms, HSN GCaMP, mCherry                                                                     | <i>lin-12(wy750) III; vsIs183 lite-1(ce314) lin-15(n765ts) X</i>          | 9              |
| MT1082  | No HSNs                                                                                                       | <i>egl-1(n487) V</i>                                                      | S2             |
| JT47    | PLC $\beta$ null mutant, infrequent defecation                                                                | <i>egl-8(sa47) V</i>                                                      | S2             |
| LX1836  | HSN Channelrhodopsin                                                                                          | <i>wzIs30 IV; lite-1(ce314) lin-15(n765ts) X</i>                          | S2             |
| MIA191  | <i>tph-1</i> null mutant HSN Channelrhodopsin, vulval muscle GCaMP5, mCherry (under <i>unc-103e</i> promoter) | <i>tph-1(mg280) II; wzIs30 IV; vsIs164 lite-1(ce314) lin-15(n765ts) X</i> | S3             |

1131

1132 **Table S1.** All strains are derived from the Bristol N2 genetic background and are listed  
 1133 above.

## 1134 **Supplemental Movie legends**

1135 Movie S1. Ratio recording of a HSN  $\text{Ca}^{2+}$  transient at the L4.9 larval stage. High  $\text{Ca}^{2+}$  is  
1136 indicated in red while low calcium is in blue. The HSN cell body and pre-synaptic terminal  
1137 are indicated. Head is at bottom, tail is at left.

1138 Movie S2. Ratio recording of a HSN  $\text{Ca}^{2+}$  transient prior to an egg-laying event in an adult  
1139 animal during the active state. High  $\text{Ca}^{2+}$  is indicated in red while low calcium is in blue.  
1140 The HSN cell body and pre-synaptic terminal are indicated. Head is at bottom, tail is at  
1141 top.

1142 Movie S3. Ratio recording of an uncoordinated vulval muscle  $\text{Ca}^{2+}$  transient at the L4.7-  
1143 8 larval stage. High  $\text{Ca}^{2+}$  is indicated in red while low calcium is in blue. Developing  
1144 anterior and posterior vulval muscles are indicated. Head is at top, tail is at bottom.

1145 Movie S4. Ratio recording of an uncoordinated vulval muscle  $\text{Ca}^{2+}$  transient at the L4.9  
1146 larval stage. High  $\text{Ca}^{2+}$  is indicated in red while low calcium is in blue. Anterior and  
1147 posterior vulval muscles are indicated. Head is at left, tail is at bottom.

1148 Movie S5. Ratio recording of a coordinated vulval muscle  $\text{Ca}^{2+}$  transient at the L4.9 larval  
1149 stage. High  $\text{Ca}^{2+}$  is indicated in red while low calcium is in blue. Anterior and posterior  
1150 vulval muscles are indicated. Head is at top, tail is at bottom.

1151 Movie S6. Ratio recording of coordinated vulval muscle  $\text{Ca}^{2+}$  transients during egg laying  
1152 in adult animals. High  $\text{Ca}^{2+}$  is indicated in red while low calcium is in blue. The anterior  
1153 and posterior vulval muscles are indicated along with a previously laid egg. Head is at  
1154 right, tail is at left.
